# Title: **Estimates and Correlates of District-Level Maternal Mortality Ratio in India**

*First Author: Srinivas Goli, PhD (Corresponding Author)*

Australia India Institute (AII) NGN Research Fellow

UWA Public Policy Institute

**University of Western Australia (UWA)**

35 Stirling Highway

Perth WA 6009

Australia

Email: [srinivas.goli@uwa.edu.au](mailto:srinivas.goli@uwa.edu.au)

T +61 8 6488 2914, M +61 41 6271232

**&**

Assistant Professor, Population Studies

Centre for the Study of Regional Development

Room No. 102, School of Social Sciences (SSS-III)

**Jawaharlal Nehru University (JNU)**

New Delhi-110067

Phone No: 011 26738798

The University of Western Australia (M251),

35 Stirling Highway,

6009 Perth, Australia

Email: [srinivas.goli@uwa.edu.au](mailto:srinivas.goli@uwa.edu.au); [sirispeaks2u@gmail.com](mailto:sirispeaks2u@gmail.com)

<http://orcid.org/0000-0002-8481-484X>

*Second Author: Parul Puri*

Department of Mathematical Demography and Statistics,

International Institute for Population Sciences

Mumbai, Maharashtra, India

Email: [parulpuri93@gmail.com](mailto:parulpuri93@gmail.com); [parul@iips.net](mailto:parul@iips.net)

<https://orcid.org/0000-0001-6272-837X>

*Third Author: Pradeep S. Salve, PhD*

Assistant Professor,

**Population Research Centre (PRC),**

Dharwad, Karnataka - 580 004, India

Phone No: +91 986 795 4621

Email: [pradeep\\_salve@biari.brown.edu](mailto:pradeep_salve@biari.brown.edu) , [pradeep8889@gmail.com](mailto:pradeep8889@gmail.com)

ORCID: <https://orcid.org/0000-0002-6879-1246>

*Fourth Author: Saseendran Pallikadavath, PhD*

Professor in Demography and Global Health,

Portsmouth-Brawijaya Centre for the Global Health,

Population and Policy,

**University of Portsmouth, United Kingdom**

Phone No: +44 (0) 2392 844442

Email: [sasee.pallikadavath@port.ac.uk](mailto:sasee.pallikadavath@port.ac.uk)

<https://orcid.org/0000-0002-2598-9949>

**NOTE: This preprint reports new research that has not been certified by peer review and should not be used to guide clinical practice.**

*Fifth Author: K.S. James, PhD*

Director & Senior Professor

**International Institute for Population Sciences (IIPS),**

Govandi Station Road, Deonar,

Mumbai – 400088, India

Phone No: 022-42372888

Email: [ksjames@iips.net](mailto:ksjames@iips.net); [ksjames@gmail.com](mailto:ksjames@gmail.com)

<https://orcid.org/0000-0002-5364-5326>

## **Estimates and Correlates of District-Level Maternal Mortality Ratio in India**

### **ABSTRACT**

Despite the progress achieved, approximately one-quarter of all maternal deaths worldwide occur in India. Till now, India monitors maternal mortality in 18 out of its 36 provinces using information from the periodic sample registration system (SRS). The country does not have reliable routine information on maternal deaths for smaller states and districts. And, this has been a major hurdle in local-level health policy and planning to prevent avoidable maternal deaths. For the first time, using triangulation of routine records of maternal deaths under Health Management Information System (HMIS), Census of India, and SRS, we provide Maternal Mortality Ratio (MMR) for all states and districts of India. Also, we examined socio-demographic and health care correlates of MMR using large-sample and robust statistical tools. The findings suggest that 70% of districts (448 out of 640 districts) in India have reported MMR above 70 deaths-a target set under Sustainable Development Goal-3. According to SRS, only Assam shows MMR more than 200, while our assessment based on HMIS suggests that about 6-states (and two union territory) and 128-districts have MMR above 200. Thus, the findings highlight the presence of spatial heterogeneity in MMR across districts in the country, with spatial clustering of high MMR in North-eastern, Eastern, and Central regions and low MMR in the Southern and Western regions. Even the better-off states such as Kerala, Tamil Nadu, Andhra Pradesh, Karnataka, and Gujarat have districts of medium-to-high MMR. In order of their importance, fertility levels, the sex ratio at birth, health infrastructure, years of schooling, post-natal care, maternal age and nutrition, and poor economic status have emerged as the significant correlates of MMR. In conclusion, we show that HMIS is a reliable, cost-effective, and routine source of information for monitoring maternal mortality ratio in India and its states and districts.

## Key questions

### What is already known?

- ▶ Despite the progress achieved, approximately one-quarter of all maternal deaths worldwide occur in India.
- ▶ Maternal mortality prevalence is highly heterogeneous across the major provinces of India.
- ▶ So far country monitors maternal mortality in 18 out of 36 states using information from the periodic sample registration system (SRS).
- ▶ Clinical and socio-demographical reasons for maternal mortality have been studied using hospital-based studies and micro-level qualitative studies.

### What are the new findings?

- ▶ For the first time, the study provides maternal mortality ratio (MMR) estimates for all states and districts of India.
- ▶ The findings suggest that 70% of districts (448 out of 640 districts) in India have reported MMR above 70 deaths per 1000 live births—a target set under Sustainable Development Goal-3.
- ▶ According to SRS, only Assam shows MMR of more than 200, while our estimates based on HMIS suggest that 6 states (and two union territory) and 128 districts demonstrate MMR above 200.
- ▶ The findings highlight the presence of spatial heterogeneity among districts in the country, with spatial clustering of high MMR in North-eastern, Eastern, and Central regions; and low MMR in the Southern and Western regions. We have also observed considerable within-state variations—across districts.
- ▶ Using a larger sample and robust statistical process, the study documents socio-demographic and health care correlates of MMR across the districts of India.

### What do the new findings imply?

- ▶ Findings help in identifying ‘hot spots’ within the states and key socio-demographic and health care correlates of maternal mortality, thus assisting in micro-level maternal health care policy and planning.
- ▶ Availability of health infrastructure, access to affordable and quality maternal health care, especially in districts with high fertility, low education, and economically poor are key pathways to reduce maternal mortality in India.
- ▶ A significant association between sex ratio at birth and MMR suggest that, maternal deaths are also happening due to unsafe abortions, thus this needs policy attention.
- ▶ HMIS is a reliable, cost-effective, and routine source for monitoring progress in the reduction of avoidable maternal mortality in India and its states and districts.

## INTRODUCTION

Maternal mortality refers to death from any complications during pregnancy and childbirth or within 42 days of termination of pregnancy, irrespective of the duration and site of the pregnancy, but not from accidental or incidental causes<sup>1</sup>. Maternal Mortality Ratio (MMR) is the number of deaths per 100,000 live births. The recent global MMR estimates suggest significant progress. In particular, from 2000 to 2017, we notice a 38% decline in MMR—from 342 deaths to 211 deaths per 100,000 live births<sup>2</sup>. However, this average annual rate of reduction (2.2%) is less than the rate of decline needed (2.7%) to achieve the Sustainable Development Goal (SDG-3.1) of 70 maternal deaths per 100,000 live births by 2030<sup>3</sup>. Though the improvement is remarkable in the context of a steep decline in the absolute number of maternal deaths from 451,000 in 2000 to 295,000 in 2017 deaths, it is still 800 women dying each day due to pregnancy complications and childbirth worldwide. Sub-Saharan Africa and South Asia contributed about 86% of maternal deaths in the world. In particular, South Asia accounts for 20% of maternal deaths, with 163 maternal deaths per 100,000 live births. Among South Asian countries, India is home to the highest number of maternal deaths (35000 maternal deaths) estimated globally in 2017. In percentage, the country accounts for 12% of global maternal deaths, next only to Nigeria (23%)<sup>2</sup>.

According to the estimates of the Sample Registration System (SRS) of India, the MMR has significantly dropped from 400 per 100,000 live births in the early 1990s to 230 in 2008 and 130 in 2016<sup>4 5</sup>. Recent estimates of SRS have witnessed a steady decline in the MMR from 130 to 113 per 100,000 live births, with the highest rate in the state of Assam (215 per 100,000 live births) and lowest in the state of Kerala (43 per 100,000 live births)<sup>5</sup>. The findings of previous studies indicate that even though the overall MMR of India has drastically declined, the rate of decline in MMR is not uniform across the states<sup>5 6 7 8 9 10 11</sup>. Empowered Action Group (EAG) states including Bihar, Madhya Pradesh, Rajasthan, Uttar Pradesh, and Assam contributed approximately 75% of the total estimated maternal deaths in India and Uttar Pradesh alone has more than 30% of the maternal deaths<sup>5 9 10</sup>.

The Government of India launched National Health Mission (NHM) in 2015, subsuming the previous National Rural Health Mission (NRHM) and National Urban Health Mission (NUHM) to bring out the necessary structural changes in public health care and delivery system in India. The NHM design provides the Reproductive-Maternal-Neonatal-Child and Adolescent Health (RMNCH+A) services, strengthening the health system to achieve the important demographic and health goals. Schemes like Janani Suraksha Yojana (JSY) under NRHM have contributed significantly to the rise in antenatal care and institutional deliveries, thereby reducing MMR<sup>12 13 14</sup>. Some of the states have already achieved or are about to achieve the SDG goal of reducing the MMR to 70 per 100,000 live births by 2030<sup>5 15</sup>. Nonetheless, seven out of eight EAG states, including Bihar, Madhya Pradesh, Chhattisgarh, Odisha, Rajasthan, Uttar Pradesh and Uttarakhand, still have a long way to go to achieve the target set under SDG-3<sup>5</sup>.

Owing to data limitations, previous studies in India documented trends and patterns in MMR for only major states and 284 districts in nine empowered action group states, while the smaller states are completely excluded from the analyses<sup>5 13 16</sup>. For a long time, the SRS has been the only reliable source of maternal mortality, which provides estimates for 18 major states<sup>5</sup>. Although the Annual Health Survey (AHS) provided MMR estimates for 284 districts in nine EAG states from 2010 to 2013<sup>4</sup>, the survey was repealed thereafter, assuming

that NFHS would be redesigned to provide district-level health indicators for all Indian districts<sup>17</sup>. However, MMR estimates based on AHS never received as much prominence as SRS. Moreover, considering within-state heterogeneity observed in other maternal and child health care indicators<sup>18</sup>, we believe that there must be considerable within-state variation in MMR. However, to our knowledge, so far, there is not a single study in India that provides MMR estimates for the smaller states and all the districts of India.

On the other hand, earlier studies that investigated socio-economic, demographic, and health care correlates of maternal mortality using either macro-level analyses based on the sample of 15 to 19 states or with the help of micro-level qualitative studies have limitations<sup>8 13 18</sup>. The socio-economic correlates identified based on the sample ranging from 15 to 18 states are less reliable, while micro-level local evidence is not nationally representative. Although a significant number of studies have documented clinical causes of maternal deaths<sup>7 10 19 20 21</sup>, the identification of socio-economic, demographic, and health care correlates immensely helps in designing policies and practices to avoid the death of women during pregnancy.

In the above context, this study makes two significant contributions: (1) for the first time, using Health Management Information System (HMIS) data, we provide MMR estimates for all 640 districts from 29 states and seven union territories of India. (2) Also, using the district-level information from National Family Health Survey (NFHS) alongside HMIS, we have assessed socio-economic, demographic and health care correlates of MMR based on a significantly larger sample than previous studies. Also, for the first time, we have included district-level health infrastructure index and maternal health care variables as predictors of MMR.

## METHODS

### Data input and processing

The study used data from multiple sources – HMIS (2017-18, 2018-19, 2019-20), the Sample Registration System (SRS, 2017-18), the Census of India (2011), and the National Family Health Survey (NFHS-4, 2015-16). The HMIS data source is the official data source of the Ministry of Health and Family Welfare (MoHFW), Government of India<sup>22</sup>. It provides the consolidated public and private health facility-based service statistics data for India on the reproductive, maternal, neonatal, child, and adult health indicators. We have accessed the unit level data through the open access link (<https://hmis.nhp.gov.in/#!/standardReports>) available in the public domain from the HMIS website.

An independent evaluation of completeness of HMIS records of maternal and child health indicators in 2016 suggests an average of 88.5% completeness, while it is as high as 94.6% for maternal health care indicators<sup>23</sup>. Moreover, HMIS has been continuously improving its information recording system over the years. Thus, we would expect much better quality information for the years 2018 to 2020 than what was observed in 2016.

The SRS has been a gold standard source for fertility and mortality data for more than five decades and the largest demographic and health survey in the country, which gives reliable estimates at the national and state level separately by urban and rural areas. The dual registration system, huge sample size and verbal autopsy instruments make the estimates of SRS more reliable and representative at the national and state level (for details, see Office of the Registrar General of India, 2020)<sup>5</sup>. The NFHS is the largest sample survey that provides information on population, health, and nutrition for states and districts of India (for details

see IIPS and ICF Macro, 2017)<sup>18</sup>. The population of women in the age group 15-49 years is drawn from the Census of India 2011<sup>24</sup>.

For the present study, we have analysed a total of 61,982,623 live births and 61,169 maternal deaths recorded in HMIS during 2017-19. HMIS enumerated numbers are considerably higher than the SRS sample of 429,173 live births and 525 maternal deaths at the all-India level during 2015-17. Further, the estimated annual number of births in India based on the birth rate from SRS is about 25 million in recent years that will amount to about 75 million in three years from 2017 to 2019<sup>5</sup>. This suggests that HMIS covers nearly 77% of all live births in India and such a high number can produce fairly reliable estimates despite potential coverage errors. This study is reported as per the Strengthening the Reporting of Observational Studies in Epidemiology (STROBE) guidelines ([Supplementary Table 1](#)). However, this study did not have a prespecified analysis plan.

### **Patient and Public Involvement**

It was not appropriate or possible to involve patients or the public in the design, or conduct, or reporting, or dissemination plans of our research.

### **Variables**

Our outcome variable is the MMR estimated using live births and maternal deaths recorded through HMIS during 2017-20. Based on variables related to maternal deaths in the previous literature<sup>6 7 8 10 13 19 20 25</sup> and also considering data availability, we have included some key maternal health care, demographic and socioeconomic predictors to explain MMR variation across the districts of India. The predictor variables include health infrastructure index (HII) antenatal care, post-natal care, institutional delivery, mean age at first birth, contraception use in women, the mean number of children ever born, percentage of underweight, and anaemic women, years of schooling, household size, percentage of women in poor wealth status, and the sex ratio at birth. Detailed definitions and descriptions of the variables are mentioned in [Table 1](#) and [Table 2](#), respectively.

### **Estimation of Maternal Mortality Ratio (MMR)**

We used triangulation of data from the HMIS, SRS, and Census of India (2011) to derive the final MMR estimates. A calibration factor (Cf) was computed and used to account for the under-(over)-reporting of maternal deaths by states and districts of India. The calibration factor was initially estimated for states, as the ratio of MMR from SRS and HMIS as shown in equation (1). For the states where MMR estimates were missing, we used the estimates of Infant Mortality Rates (IMR) as a proxy to MMR estimates to compute the calibration factor. In this case, the calibration factor was the ratio of IMR from SRS and HMIS, as shown in equation (2). The mathematical expressions for the aforementioned computations are as follows:

$$Cf = \frac{SRS\_MMR^{State\_Estimate}}{HMIS\_MMR^{State\_Estimate}} \quad (1)$$

And, for the states where MMR is missing in SRS, we utilized the value of IMR as a proxy. In this case, the expression for computation of Cf can be written as follows:

$$Cf = \frac{SRS\_IMR^{State\_Estimate}}{HMIS\_IMR^{State\_Estimate}} \quad (2)$$



Then, we have adjusted the district estimates of each state using the calibration factor (Cf) derived for that particular state using the aforementioned procedure in equations 1 and 2. The adjusted MMR for each district was derived as below:

$$\text{District MMR}^{\text{Adjusted}} = \text{District MMR}^{\text{Unadjusted}} * \text{Cf} \quad (3)$$

Finally, we have derived the adjusted state estimates using adjusted district MMRs and district population weights. Population weight for each district is derived using the information on women 15-49 years of age from Census of India, 2011. This procedure will adjust for district-level unequal size in error margins proportionately weighted by population size while deriving the state-level adjusted MMRs using HMIS data. The estimated MMR for each state is as follows:

$$\text{State MMR}^{\text{Adjusted}} = \frac{\sum_{i=1}^n \text{District MMR}^{\text{Adjusted}} * \text{pw}}{n} \quad (4)$$

Where pw is population weight defined as:

$$\text{pw} = \frac{\text{Total female population of the district in age 15-49 years}}{\text{Total female population of the State in age 15-49 years}} \quad (5)$$

### Geographical distribution and spatial clustering

We have carried out statistical analyses in three stages: First, used GIS mapping to show the geographical distribution of MMR across the states and districts of India. In the second stage, to assess the extent of geographical clustering, univariate local Moran's I and Local indicator of Spatial Association (LISA) cluster and significance maps were employed. Spatial proximity was quantified using the Queen contiguity matrix, which includes neighbours sharing geographical boundaries of non-zero length<sup>26</sup>. Moran's I statistics range between -1 and +1, where a positive, negative and zero value is indicative of positive, negative, and no spatial autocorrelation, respectively<sup>27 28</sup>. Cluster map depicts the locations (districts) with a significant local Moran's I statistic classified by spatial auto-correlation type; the color red symbolises the hot spots (districts with high MMR levels, with similar neighbours), green symbolises the cold spots (districts with low MMR levels, with similar neighbours), and the light blue and light red color symbolizes the spatial outliers (districts with high MMR levels, but with low- MMR level neighbours and vice-versa).

### Ordinary least square regression model: Macro-level correlates

In the last stage, we have carried out an Ordinary least square (OLS) log-linear regression model to understand the maternal health care, demographic and socioeconomic correlates of MMR. We have modelled six OLS regressions to avoid the collinearity between the explanatory variables. Except for model 6, we have avoided highly collinear variables ( $r > 0.60$ ) in the same model based on the correlation matrix of the study explanatory variables.

The mathematical expression of the model is given below:

$$Y_{(\text{Log\_MMR})} = a + b_1 X_1 (\text{Log\_HII}) + b_2 X_2 (\text{Log\_No.of ANCs}) + b_k X_{k...} + \epsilon_i \quad (6)$$

Where Y is the outcome variable (*i.e.* MMR), which is influenced by a set of predictor variables  $X_1, X_2, X_3, \dots, X_k$  (*e.g.*, HII, antenatal care, postnatal care, institutional delivery, mean age at first birth) in the manner specified with parameters  $\beta_1, \beta_2, \dots, \beta_k$ .

Statistical analyses were performed using STATA 16 statistical software (Stata Corporation, College Station, TX, USA).

## RESULTS

### Geographical variation and spatial clustering of maternal mortality

Figure 1 depicts the spatial pattern of MMR across 29 states and 7 union territories in India. Findings underline considerable geographical heterogeneity in MMR across Indian states. MMR was categorised into four groups, less than 70, 70-139, 140-209, greater than or equal to 210 deaths per 100000 live births. The first cut-off was taken at 70 which is a primary target under SDG-3 for MMR; while the second cut-off at 140 is a second target under SDGs. Further, the same interval has been taken to create two more categories<sup>15</sup>. Such categorisation allows classifying Indian states and districts as those achieved, near to achieve, or far from the achievable SDG target 3.1.

Among the states, the highest MMR is found in Arunachal Pradesh (284) and the lowest in Maharashtra (40). The findings illustrate that five states, including Arunachal Pradesh (284), Manipur (282), Andaman and Nicobar Island (275), Meghalaya (266), and Sikkim (228), have MMR greater than or equal to 210. Nine States and two Union Territories have MMR in the range of 140-209. These states are Nagaland (143), Punjab (143), Chhattisgarh (144), Jammu and Kashmir (151), Delhi (162), Rajasthan (162), Bihar (164), Madhya Pradesh (179), Lakshadweep (208), Uttar Pradesh (208), and Assam (209).

Eleven states have MMR in the range of 70-139: Gujarat (76), Jharkhand (78), Karnataka (85), Haryana (90), Goa (91), West Bengal (100), Uttarakhand (107), Tripura (119), Himachal Pradesh (127), Mizoram (131), and Odisha (138). Furthermore, the estimates indicate that nine out of 36 provinces have MMR less than 70: Chandigarh (15), Maharashtra (40), Puducherry (41), Kerala (44), Daman and Diu (48), Telangana (53), Tamil Nadu (56), Dadra and Nagar Haveli (61) and Andhra Pradesh (64) ([Supplementary Table 2](#)).

[[Figure 1](#) Geographical pattern of maternal mortality ratio by states/union territories in India, HMIS]

Figure 2 depicts the geographical pattern of MMR in 640 districts of India. Among the districts, the highest MMR is found in Tirap district in Arunachal Pradesh (1671), while thirteen districts reported lowest MMR levels, these included seven districts from Arunachal Pradesh (0), two districts from Himachal Pradesh (0) and one district from Jammu & Kashmir (0), Maharashtra (0), Puducherry (0), and Uttarakhand (0), each. The results indicate that 192 districts have MMR less than 70 and 210 districts fall in the range of 70-139. However, about 124 districts have MMR in the range 140-209, and 114 districts fall in the category of greater than or equal to 210. In particular, among the districts with MMR greater than or equal to 210, 46 districts belonged to the Central Region, and 33 districts are located in the North-eastern region; while 18 districts belonged to the Northern region and 16 to the Eastern region.

A majority of the districts in southern India and Maharashtra have an MMR of less than 70. Around 70 districts from Southern (68 district) India have MMR less than 70, followed by Western (46 districts), Eastern (30 districts), and Northern (30 districts) regions. While North-eastern (12 district) and Central (6 districts) regions have the least number of districts that achieved the primary SDG target of MMR ([Supplementary Table 3](#)).



However, [Figure 2](#) also demonstrates the presence of huge within-state inequalities. For instance, the state of Karnataka as a whole, falls in the category of 70-139, but several of its districts have an MMR above 140. Similarly, some districts in Tamil Nadu, Kerala, Andhra Pradesh, and Telangana also have MMR above 140, despite all four states falling in the category of MMR below 70 at state level. A similar kind of district-level heterogeneity is observed in other states as well.

[[Figure 2](#) Geographical pattern of maternal mortality ratio by 640 districts in India, HMIS]

Supporting these findings, the results from univariate LISA ([Figure 3](#)) also suggest the presence of spatial heterogeneity in MMR with statistically significant spatial autocorrelation (Moran's  $I=0.229$ ,  $p\text{-value}=0.001$ ) across districts in the country. Geographical clustering of high MMR was observed in the North-eastern and parts of the Central region. Southern and Western regions in the country reported a noticeable geographical clustering of low MMR.

[[Figure 3](#). Univariate Moran's  $I$  for Maternal Mortality Ratio in India]

Furthermore, bivariate LISA assessed the spatial association between the selected background variables and MMR for 640 districts in the country. The findings from the bivariate spatial analysis are presented in [Supplemental Figure 1](#). Bivariate analysis suggests that regions with low age at first birth, low contraception use, high mean number of children ever born, higher percentage of underweight and anaemic women are more likely to report higher MMR. Also, the MMR is found to be higher for the districts with a lower percentage of four or more ANC, lower percentage of post-natal care, lower percentage of institutional deliveries, and lower health infrastructure. Lower percentage of ten or more years of schooling, higher mean household size, low percentage urban population, and higher percentage poor economic status are more likely to report higher MMR among districts in India. However, there are several exceptional cases found where regions with higher age at first birth and lower prevalence of anaemic women also found with higher MMR, thus indicating spatial heterogeneity in the relationship between MMR and socio-economic characteristics. It also suggests that MMR is influenced by a multitude of factors, thus investigation of the net effect of socioeconomic correlates controlling for confounders is important.

### **Factors associated with maternal mortality: a macro-level analysis**

[Table 3](#) presents the net effect of socio-economic, demographic, and health care correlates of maternal mortality ratio based on the OLS regression model. In model 1, before controlling for other correlates, ANCs ( $\beta= -0.273$ ,  $p<0.01$ ) is negatively associated with MMR. However, in models 2, 5, and 6, when we controlled for all other correlates, 4 or more ANC visits do not show the desired relationship with MMR. Similarly, when we run the regression model considering only health infrastructure and maternal health care variables, health infrastructure ( $\beta= -0.551$ ,  $p<0.01$ ) and PNCs within 48 hours of delivery ( $\beta= -0.279$ ,  $p<0.1$ ) are negatively associated and statistically significant. Surprisingly, institutional delivery is positively associated and statistically not significant across all the models.

Using only demographic variables, the results in model-3 suggest that age at first birth ( $\beta= 7.905$ ,  $p<0.1$ ), ever use of contraception ( $\beta= 0.219$ ,  $p<0.05$ ) and children ever born ( $\beta= 1.822$ ,  $p<0.01$ ) are positively associated, while BMI ( $\beta= -0.437$ ,  $p<0.05$ ) is negatively associated with

MMR. Model 4 which uses only socio-economic variables reveals that the sex ratio at birth ( $\beta = -1.218$ ,  $p < 0.01$ ) is negatively associated, while the poor economic status of the households ( $\beta = 0.215$ ,  $p < 0.01$ ) is positively linked to MMR. Share of SC/ST population is positively associated ( $\beta = 0.188$ ,  $p < 0.05$ ) with MMR in Model 5. Model 6 that controls for all variables suggests that health infrastructure ( $\beta = -0.535$ ,  $p < 0.01$ ), PNCs within 48 hours of delivery ( $\beta = -0.370$ ,  $p < 0.05$ ), BMI ( $\beta = -0.357$ ,  $p < 0.01$ ) and year of schooling ( $\beta = -0.437$ ,  $p < 0.01$ ) are negatively associated, while age at first birth ( $\beta = 7.431$ ,  $p < 0.05$ ) and children ever born ( $\beta = 1.589$ ,  $p < 0.01$ ) are positively and significantly correlated with MMR. The institutional deliveries continue to show statistically insignificant negative relationships.

### **Robustness checks: Data reliability assessment**

The first robustness check parameter used in this study is estimation of completeness of birth registration in HMIS. The estimated annual number of births in India is about 81 million in three years from 2017 to 2019; while reported cumulative live births during 2017-19 under HMIS is 62 million—this suggest that HMIS has coverage of 77% of all estimated live births in the country. Among major states, with 95%, Telangana and Kerala show the highest completeness of birth registration; while the corresponding figure is lowest in the state of Uttar Pradesh (62%). However, 26 out of 37 states and union territories have completeness of birth registration equal to or above the national average. Twenty out of 37 states and 17 of 37 states show above 80% and 85% of completeness of birth registration which indicates that HMIS information is highly reliable for deriving basic demographic estimates (Figure 4). Although the missing deaths or deaths that physicians were unable to code cannot be ignored but given their low proportion, conservatively it is safe to assume that they did not affect the general regional pattern of MMR shown in this study.

[Figure 4 Percentage of reported live births out of estimated live births by states in HMIS, 2017-19]

The second parameter used to make a reliability assessment of MMR estimates based on HMIS, is the comparison of MMR estimates from HMIS to corresponding estimates from SRS for the major states. At all India level, SRS shows 130 in 2014-16 and 113 in 2016-18, while HMIS reports 122 in 2017-19 (Supplementary Table 2). In Figure 5, we plot MMR estimates from SRS and HMIS. The MMR estimates from HMIS are close to SRS in socio-demographically better-off states (Andhra Pradesh, Gujarat, Karnataka, Tamil Nadu, and Kerala, Maharashtra, etc.), while the gap is slightly higher in socio-demographically weaker states (Assam, Bihar, Chhattisgarh, Uttar Pradesh, Madhya Pradesh, and Odisha). Despite a slight gap in MMR estimates from HMIS and SRS in a few states, the pattern remains more or less the same in the estimates from both sources: the MMR is higher in socio-demographically weaker states compared to their counterparts in socio-economically advanced states. The similar evidence can also be observed in case of comparison of IMR from SRS and MMR from HMIS. We found a high positive correlation between IMR from SRS and MMR from HMIS with a correlation coefficient of 0.78 (Figure 6).

[Figure 5 Correspondence between MMR estimates from SRS and HMIS]

[Figure 6 Correlation between IMR estimates from SRS and MMR estimates from HMIS]

Thirdly, comparison MMR estimates from other sources with our estimates suggest that both SRS and HMIS based MMR is much lower than the Global Burden of Disease (GBD) study estimate of 247.6 for 2015, but closer to estimates (145 in 2017) by WHO, UNICEF, UNFPA, World Bank Group and the United Nations Population Division<sup>2 5 29</sup>. Overall, our MMR estimates using HMIS more or less align with SRS estimates and the estimates from WHO, UNICEF, UNFPA, World Bank Group, and the United Nations Population Division<sup>2 5</sup>.

Fourth, we further compared a few other basic demographic estimates from HMIS (2017-19) with SRS (2018). For instance, IMR from HMIS (2017-19) is 26.2 against 32 from SRS (2018). Similarly, the Sex Ratio at Birth from HMIS (2017-19) is 108 against 111 from SRS (2018). While Crude Birth rate in HMIS is 24, it is 20.2 in SRS. HMIS based IMR, SRB, and CBR estimates are also close to corresponding year estimates from the report of the technical group on population projections<sup>31</sup> (Supplementary Table 4).

Fifth, the macro-level regression estimates showing expected direction of association between health infrastructure, maternal health care and socio-demographic indicators and MMR also strengthen our belief that the estimates are in line with the status of districts socio-demographic and health status. If there was a health facility-led bias in MMR registration, we would not have seen the expected direction of the relationship between these variables. Overall assessment of the quality of data reported in HMIS vis-à-vis gold standard SRS estimates suggests that HMIS fares well with slight discrepancies with reference to SRS. However, in the absence of other reliable data sources at the micro-level (district-level) in India, HMIS fills the gap with decent quality information that can help policy and planning at district level in the country.

## DISCUSSION

Considering the global SDG targets, all countries are expected to have MMR below 70 per 100,000 live births, and no country with MMR above 140 per 100,000 live births by 2030<sup>3</sup>. In view of this, 71 percent of the total districts (456 out of 640 districts) in India have reported MMR above 140. According to SRS (2016-18), only Assam (215) has MMR of more than 200, while our district-level assessment based on HMIS suggests that about 130 districts have reported above 200 maternal deaths per 100,000 live births. Thus, our findings from mapping and spatial analyses highlight the presence of a greater spatial heterogeneity across districts in the country, with spatial clustering (hot-spots) of high MMR in the North-eastern and Central regions, and low MMR in the Southern and Western regions. However, we have also observed considerable within-state variations in states across their districts. Even the better-off states such as Kerala, Tamil Nadu, Andhra Pradesh, Karnataka, and Gujarat have pockets of medium to high MMR that needs policy attention. Owing to data availability, so far, only Assam from the North-eastern region was in the lime-light for higher maternal deaths, but with this study, it has been learned that the entire region is facing a similar problem and needs policy attention.

Our assessment of socio-economic correlates of MMR suggests that improvement in antenatal care, postnatal care within 48 hours of delivery, BMI, years of schooling, and reduction of higher-order births, births in higher ages, and poor economic status will help in reducing MMR in the districts of India. The districts with better health infrastructure have significantly less MMR, while those with a high SC/ST population show higher MMR levels. However, the most surprising factor is the lack of significant negative association of

institutional deliveries with MMR. Looking at this finding in conjunction with previous studies, which showed an unexpected relationship with both infant mortality and maternal mortality, suggests that it may be because a considerable number of women rush to institutional deliveries when complications arise; most often a majority of them have not obtained full and quality antenatal care<sup>11 13</sup>. Thus, the risky deliveries contribute to the greater number of deaths at the institutions compared to home deliveries<sup>12 13 30</sup>. In particular, Randive and colleagues found that a gap exists between access to just institutional deliveries and access to emergency obstetric care, perhaps demonstrating that women delivering in institutions are not automatically receiving sufficient care<sup>16</sup>. Another startling finding is the positive relationship between contraceptive use and MMR. However, such a relationship is possible in the context of low quality of care in family planning which leads to greater maternal morbidity and increases the risk of obstetric complication and mortality<sup>18</sup>.

From a policy perspective, the findings of the study advance two key messages: first, despite decent progress in reducing maternal mortality, several districts in India need to initiate immediate action to meet the ambitious SDG-3 target of MMR, and ultimately eliminate preventable maternal mortality. Although the district-specific rates of reduction that are needed to achieve SDG targets are ambitious for most high MMR districts, the states that made a concerted effort to reduce maternal mortality, especially post-2005 provide pathways on how to accomplish the acceleration necessary to substantially reduce preventable maternal deaths. In particular, post-2005 MMR reduction in Maharashtra, Telangana, and Andhra Pradesh are very impressive<sup>5 13</sup>.

Secondly, the study highlights that maternal health care, especially postnatal care, and maternal nutrition are key for reducing maternal mortality. Considering that children ever born, years of schooling and poor household economic status also emerged as critical factors, avoiding higher-order births, ensuring dissemination of right maternal health knowledge and affordable essential services helps in accelerating the process of reduction in MMR. Despite JSY being in place, out of pocket expenditure on maternal health care in several states of India is way higher than JSY incentives<sup>32</sup>; which might be impacting on accessing quality antenatal and institutional delivery care and as a result, this is impacting on reducing maternal mortality. Therefore, ongoing Pradhan Mantri Matruva Vandhana Yojana (PMMVY) must consider the raising of JSY incentives to ensure affordable and quality maternal health care to all. Moreover, a significant association between sex ratio at birth and MMR suggests that, maternal deaths are also happening due to unsafe abortions, and thus needs policy attention. A highly developed state like Punjab falling in the moderate to high category of MMR also raises the question that unsafe sex-selective abortions may be contributing to maternal deaths.

Third, although the reliability of routinely recorded mortality data by health system employees has been continuously questioned<sup>33</sup>, if it is handled well, systems like HMIS would be a permanent solution to the long-standing problem of the absence of micro-level demographic and health information in India. Despite some caveats associated with HMIS data on maternal deaths, in the absence of any other reliable data sources at micro-level (district-level) in India, it fills the gap with decent quality information that can help policy and planning at district level in the country. In general, vital registration systems such as HMIS lack political priority in several states thus leading to poor management, supervision, and underfunding. While an efficient system of death reporting may be more complex and entail institutional arrangements across many governmental departments, they can be made to

work subject to strong regional momentum and leadership. Given the encouraging results already achieved with minimal support for HMIS, an integrated review system and supervision should probably produce better results. Therefore, our study will rejuvenate the plan of increasing efforts to revive the vital registration system at a national level with an inspiration of reasonably good quality registration evident in case of maternal deaths under HMIS.

### **Acknowledgments**

We thank P.M. Kulkarni (Rtd Professor, Center for the Studies in Regional Development, Jawaharlal Nehru University) for numerous discussions about HMIS data and methodology of MMR estimation using HMIS; and also, for reviewing the first draft of the paper. We also thank Prof. Christophe Guilmoto (a senior fellow in Demography at the French Institut de Recherche pour le Développement (IRD)) and Prof. Arvind Pandey (Former Director, National Institute of Medical Statistics, New Delhi) for useful discussion about the demographic estimates using the vital registration system data.

**Funding** None declared

**Competing interests** None declared

**Patient consent for publication** Not required.

**Provenance and peer review** Not commissioned; externally peer-reviewed.

**Twitter** Srinivas Goli @ SrinivasGoli1

**Contributors** **Srinivas Goli** contributed to the study conceptualization. **Srinivas Goli** designed the study. **Srinivas Goli** and **Pradeep Salve** performed the literature search. **K.S. James** and **Pradeep Salve** undertook the data collection. **Parul Puri** and **Srinivas Goli** performed statistical analyses of all data in this study. **Srinivas Goli**, **Parul Puri** and **Pradeep Salve** drafted the manuscript. **Saseendran Pallikadavath** and **K.S. James** reviewed and finalized the draft. All authors analyzed and interpreted the results and provided comments on and critical revision of the manuscript. **Saseendran Pallikadavath** and **K. S. James** are the guarantors.

**Data availability statement** All data relevant to and included in the study are available in the public domain at the following links:

HMIS: <https://hmis.nhp.gov.in/#!/standardReports>

NFHS-4, 2015-16: <https://dhsprogram.com/data/available-datasets.cfm>

### **ORCID iDs**

Srinivas Goli <https://orcid.org/0000-0002-8481-484X>

Parul Puri <https://orcid.org/0000-0001-6272-837X>

Saseendran Pallikadavath <https://orcid.org/0000-0002-2598-9949>

Pradeep Salve <https://orcid.org/0000-0002-6879-1246>

K. S. James <https://orcid.org/0000-0002-5364-5326>

### **Supplementary material**

**Supplementary Table 1.** STROBE Checklist. STROBE, strengthening the reporting of observational studies or cross-sectional studies in epidemiology. (DOC)

**Supplementary Table 2** State-wise estimates of MMR from SRS and HMIS. (DOC)

**Supplementary Table 3** District-wise estimates of MMR from HMIS. (DOC)

**Supplementary Figure 1** Bivariate LISA (Cluster and Significance) maps depicting spatial clustering and spatial outliers of maternal mortality ratio by selected background characteristics in India. (DOC)

**Supplementary Table 4** Comparison of Infant Mortality Rate, Sex Ratio at Birth and Crude Birth Rate from SRS and HMIS. (DOC)

## REFERENCE

- 1 WHO. Mortality and burden of disease. World Heal. Organ. 2021.
- 2 World Health Organization (WHO). Maternal mortality : level and trends 2000 to 2017 Estimates by WHO, UNICEF, UNFPA, World Bank Group and the United Nations Population Division. 2019;:12.<https://www.who.int/reproductivehealth/publications/maternal-mortality-2000-2017/en/>
- 3 Transforming our World: The 2030 agenda for Sustainable Development. United Nations Dev. Progr. 2015.<https://sdgs.un.org/2030agenda>
- 4 Ministry of Health and Family Welfare G of I. Special Bulletin on Maternal Mortality in India 2014-16. *SRS Bull* 2018;:1–3.[http://www.censusindia.gov.in/vital\\_statistics/SRS\\_Bulletins/MMR\\_Bulletin-2014-16.pdf](http://www.censusindia.gov.in/vital_statistics/SRS_Bulletins/MMR_Bulletin-2014-16.pdf)
- 5 Office of the Registrar General I. Special Bulletin on Maternal Mortality in India 2016-18. *Sample Regist Syst* 2020;:1–4.
- 6 Barros AJ, Ronsmans C, Axelson H, *et al.* Equity in maternal, newborn, and child health interventions in Countdown to 2015: A retrospective review of survey data from 54 countries. *Lancet* 2012;**379**:1225–33. doi:10.1016/S0140-6736(12)60113-5
- 7 Montgomery AL, Ram U, Kumar R, *et al.* Maternal mortality in India: Causes and healthcare service use based on a nationally representative survey. *PLoS One* 2014;**9**. doi:10.1371/journal.pone.0083331
- 8 Jat TR, Deo PR, Goicolea I, *et al.* Socio-cultural and service delivery dimensions of maternal mortality in rural central India: A qualitative exploration using a human rights lens. *Glob Health Action* 2015;**8**:1–15. doi:10.3402/gha.v8.24976
- 9 Ministry of Health and Family Welfare; Government of India. Guidelines for Maternal Death Surveillance & Response. 2017. [http://www.nhm.gov.in/images/pdf/programmes/maternal-health/guidelines/Guideline\\_for\\_MDSR.pdf](http://www.nhm.gov.in/images/pdf/programmes/maternal-health/guidelines/Guideline_for_MDSR.pdf)



- 10 Horwood G, Opondo C, Choudhury SS, *et al.* Risk factors for maternal mortality among 1.9 million women in nine empowered action group states in India: secondary analysis of Annual Health Survey data. *BMJ Open* 2020;**10**:e038910. doi:10.1136/bmjopen-2020-038910
- 11 Salve PS, Naiker SK, Golandaj JA, *et al.* Situational analysis of maternal death review in India: Evidence from health management information system. *Child Youth Serv Rev* 2020;**119**:105723. doi:<https://doi.org/10.1016/j.chilyouth.2020.105723>
- 12 Lim SS, Dandona L, Hoisington JA, *et al.* India's Janani Suraksha Yojana, a conditional cash transfer programme to increase births in health facilities: an impact evaluation. *Lancet* 2010;**375**:2009–23. doi:10.1016/S0140-6736(10)60744-1
- 13 Goli S, Jaleel ACP. What is the cause of the decline in maternal mortality in india? evidence from time series and cross-sectional analyses. *J Biosoc Sci* 2014;**46**:351–65. doi:10.1017/S0021932013000564
- 14 Randive BB, Chaturvedi SD, Diwan V, *et al.* Effective coverage of institutional deliveries under the Janani Suraksha Yojana programme in high maternal mortality provinces of India: analysis of data from an annual health survey. *Lancet* 2013;**381**:S123. doi:10.1016/s0140-6736(13)61377-x
- 15 United Nations. The Sustainable Development Goals Report-2018. New York: 2018.
- 16 Randive B, Diwan V, De Costa A. India's Conditional Cash Transfer Programme (the JSY) to Promote Institutional Birth: Is There an Association between Institutional Birth Proportion and Maternal Mortality? *PLoS One* 2013;**8**. doi:10.1371/journal.pone.0067452
17. Krishnan, V. Govt discontinued annual health survey of India, 25 Jul 2013. <https://www.livemint.com/Politics/zjD4pm80nNrUgpbvpcBRKK/Govt-discontinues-annual-health-survey.html>.
- 18 IIPS, Macro I. National Family Health Survey (NFHS-4). 2017. <http://rchiips.org/NFHS/NFHS-4Reports/India.pdf>
- 19 Bhatia JC. Levels and Causes of Maternal Mortality in Southern India. *Stud Fam Plann* 1993;**24**:310–8. <https://pubmed.ncbi.nlm.nih.gov/8296332/>
- 20 Ganatra BR, Coyaji KJ, Rao VN. Too far, too little, too late: A community-based case-control study of maternal mortality in rural west Maharashtra, India. *Bull World Health Organ* 1998;**76**:591–8. <https://pubmed.ncbi.nlm.nih.gov/10191555/>
- 21 Bhattacharyya SK, Majhi AK, Seal SL, *et al.* Maternal mortality in India: A 20-year study from a large referral medical college hospital, West Bengal. *J Obstet Gynaecol Res* 2008;**34**:499–503. doi:10.1111/j.1447-0756.2008.00721.x
- 22 Ministry of Health & Family Welfare (MoHFW), 2020, Health Management Information System (HMIS), 2017-2019, available online at <http://nrhm-mis.nic.in>.
- 23 Sharma A, Rana SK, Prinja S, *et al.* Quality of health management information system for maternal & child health care in Haryana state, India. *PLoS One* 2016;**11**:1–11. doi:10.1371/journal.pone.0148449

- 24 New Delhi: Office of the Registrar General and Census Commission. Ministry of Home Affairs G of I. Census of India 2011. 2011.[www.censusindia.gov.in/2011-common/census\\_2001.html](http://www.censusindia.gov.in/2011-common/census_2001.html)
- 25 Vora DP, Shelke PS. Effects of health education tool on select epidemiological factors associated with adult obese urban slum women. *Indian J Public Health* 2017;**61**:254–60. doi:10.4103/ijph.IJPH\_99\_16
- 26 Puri P, Khan J, Shil A, *et al.* A cross-sectional study on selected child health outcomes in India : Quantifying the spatial variations and identification of the parental risk factors. *Sci Rep* 2020;:1–15. doi:10.1038/s41598-020-63210-5
- 27 Getis A, Ord JK. The Analysis of Spatial Association by Use of Distance Statistics. 1992;**24**. doi:10.1111/j.1538-4632.1992.tb00261.x
- 28 Anselin L. Local Indicators of Spatial Association (LISA). *Geogr Anal* 1995;**27**:93–115. doi:10.1111/j.1538-4632.1995.tb00338.x
- 29 Kassebaum NJ, Barber RM, Dandona L, *et al.* Global, regional, and national levels of maternal mortality, 1990–2015: a systematic analysis for the Global Burden of Disease Study 2015. *Lancet* 2016;**388**:1775–812. doi:10.1016/S0140-6736(16)31470-2
- 30 Goldie SJ, Sweet S, Carvalho N, *et al.* Alternative strategies to reduce maternal mortality in India: A cost-effectiveness analysis. *PLoS Med* 2010;**7**. doi:10.1371/journal.pmed.1000264.
31. National Commission on Population (2020). Report on Population Projections for India and States, 2011–36, National Health Mission, Government of INDIA, New Delhi.
32. NSSO. National Sample Surveys (2018): Social consumption (Health) 2017–18, MoSPI, Government of India, New Delhi.
33. Pandey A, Roy N, Bhawsar R, Mishra RM. Health information system in India: issues of data availability and quality. *Demography India*. 2010 Jan;**39**(1):111–28.

## Figures

**Figure 1.** The geographical pattern of maternal mortality ratio by states/union territories in India, HMIS.

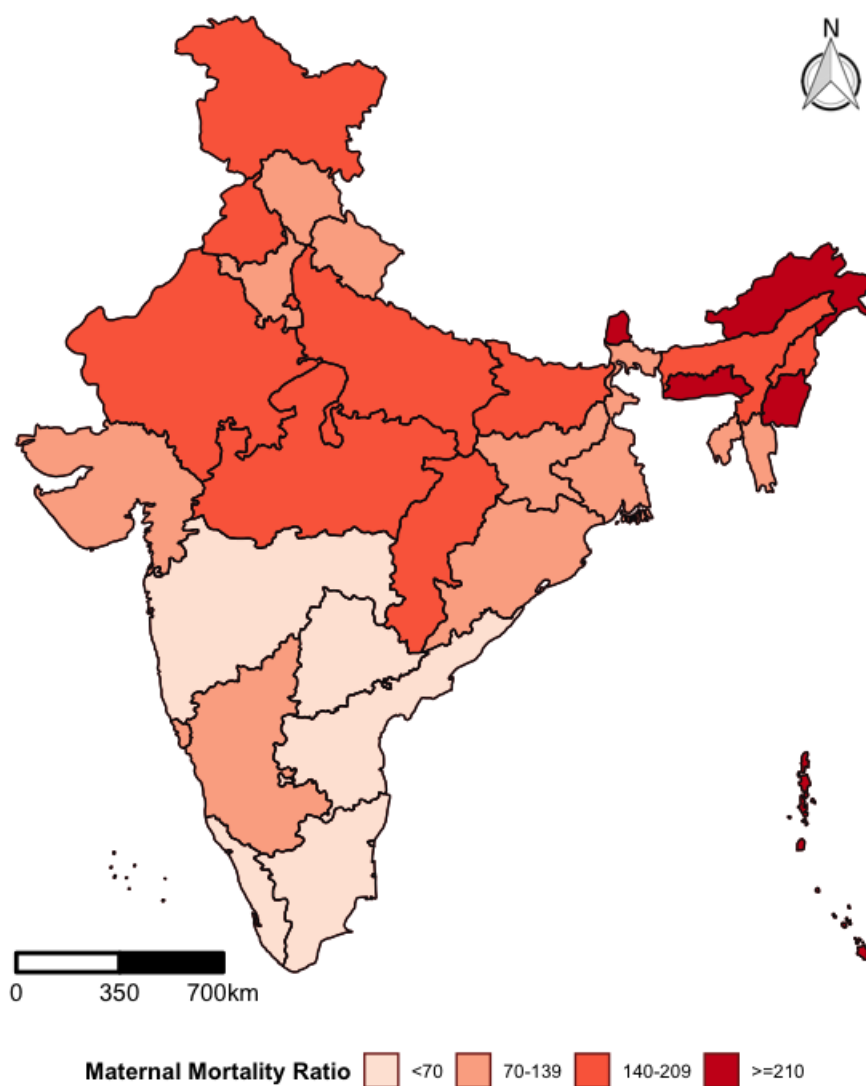

**Figure 2.** The geographical pattern of maternal mortality ratio by 640 districts in India, HMIS.

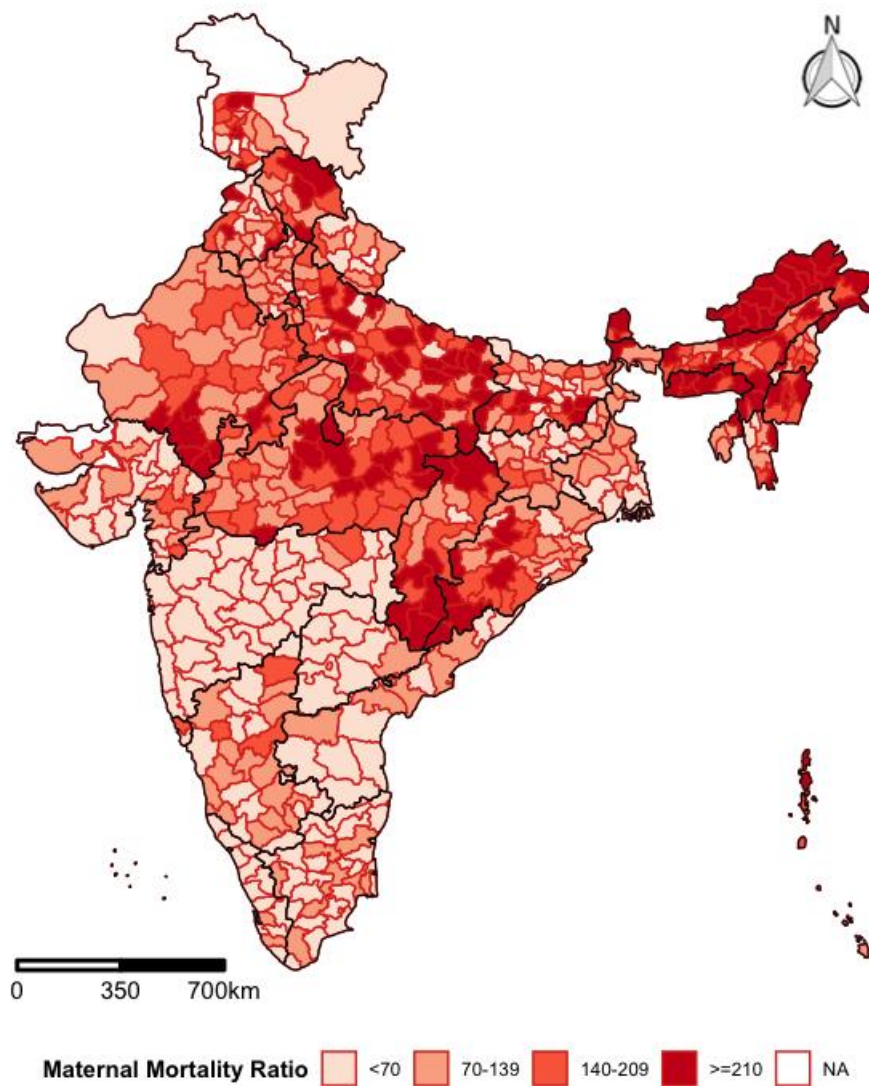

**Figure 3.** Univariate Moran's I for Maternal Mortality Ratio in India.

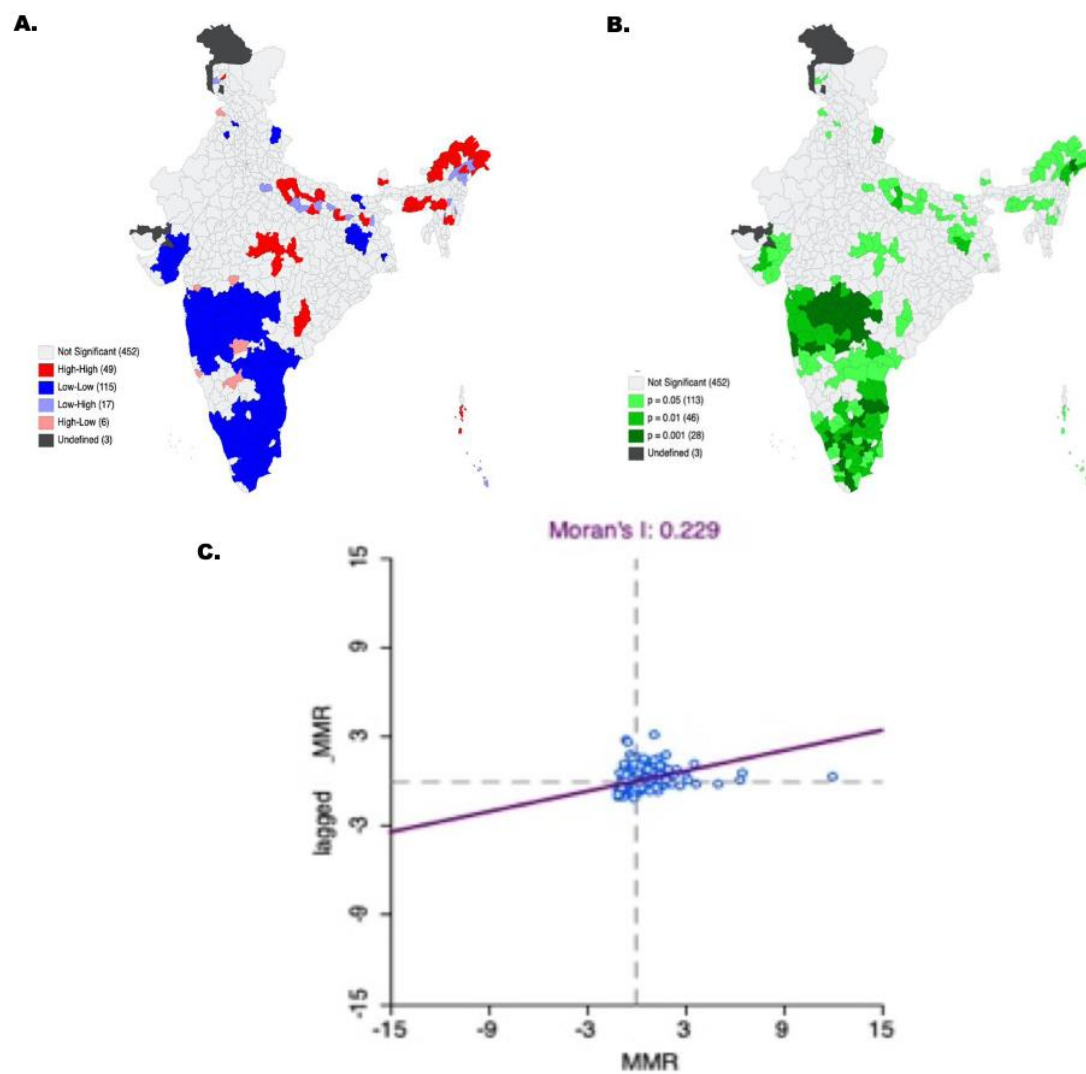

**Figure 4.** Percentage of reported live births out of estimated live births by states in HMIS, 2017-19.

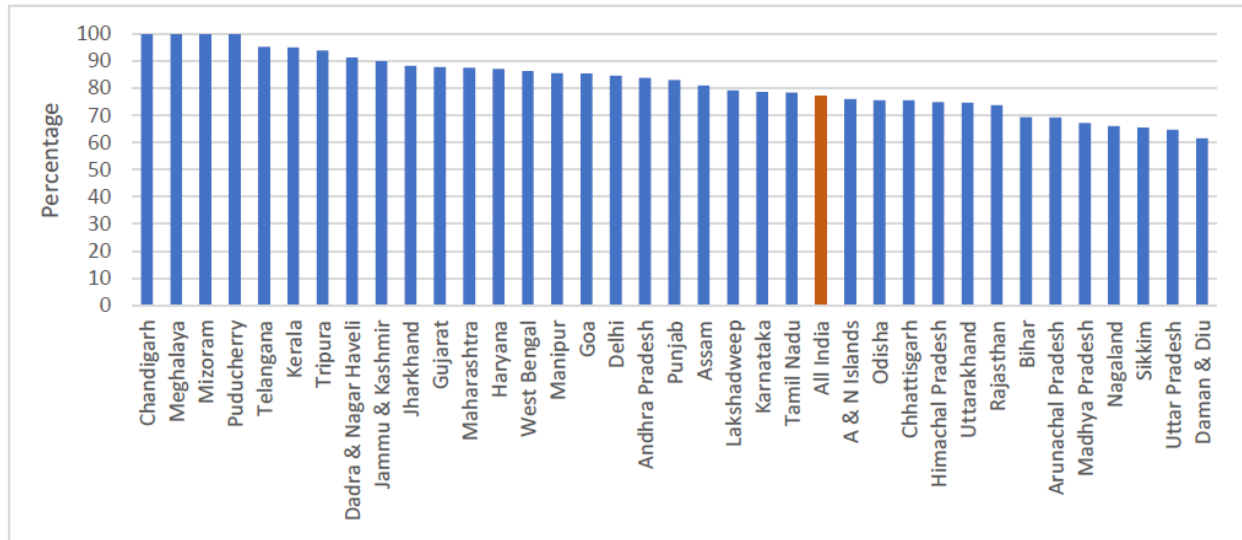



**Figure 5.** Correspondence between MMR estimates from SRS and HMIS.

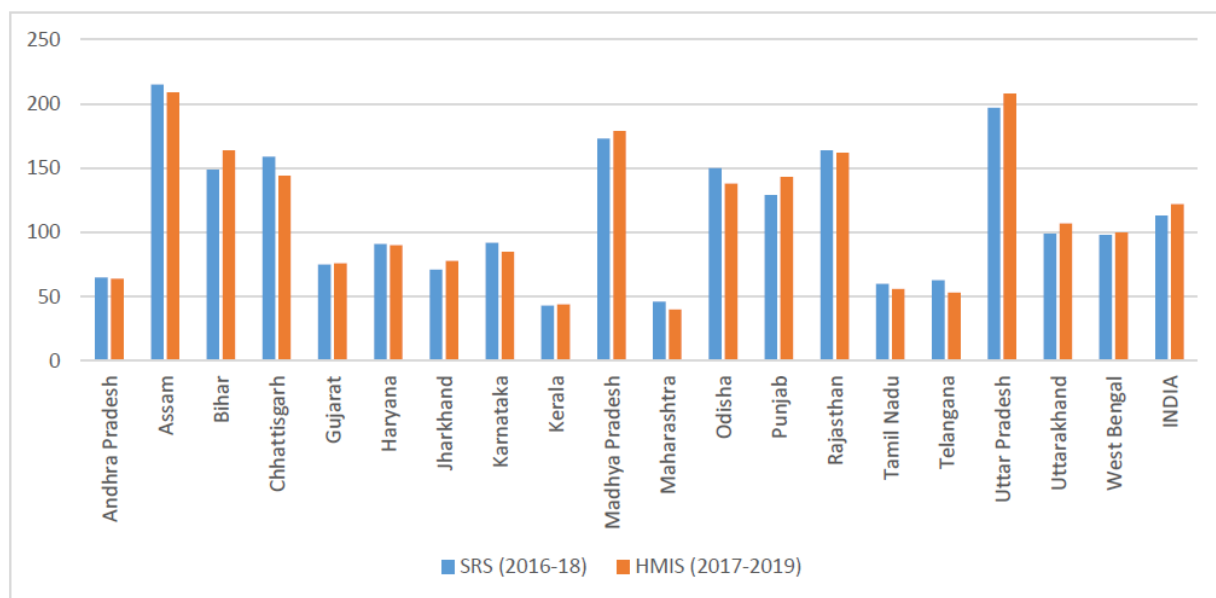

**Figure 6.** Correlation between IMR estimates from SRS and MMR estimates from HMIS.

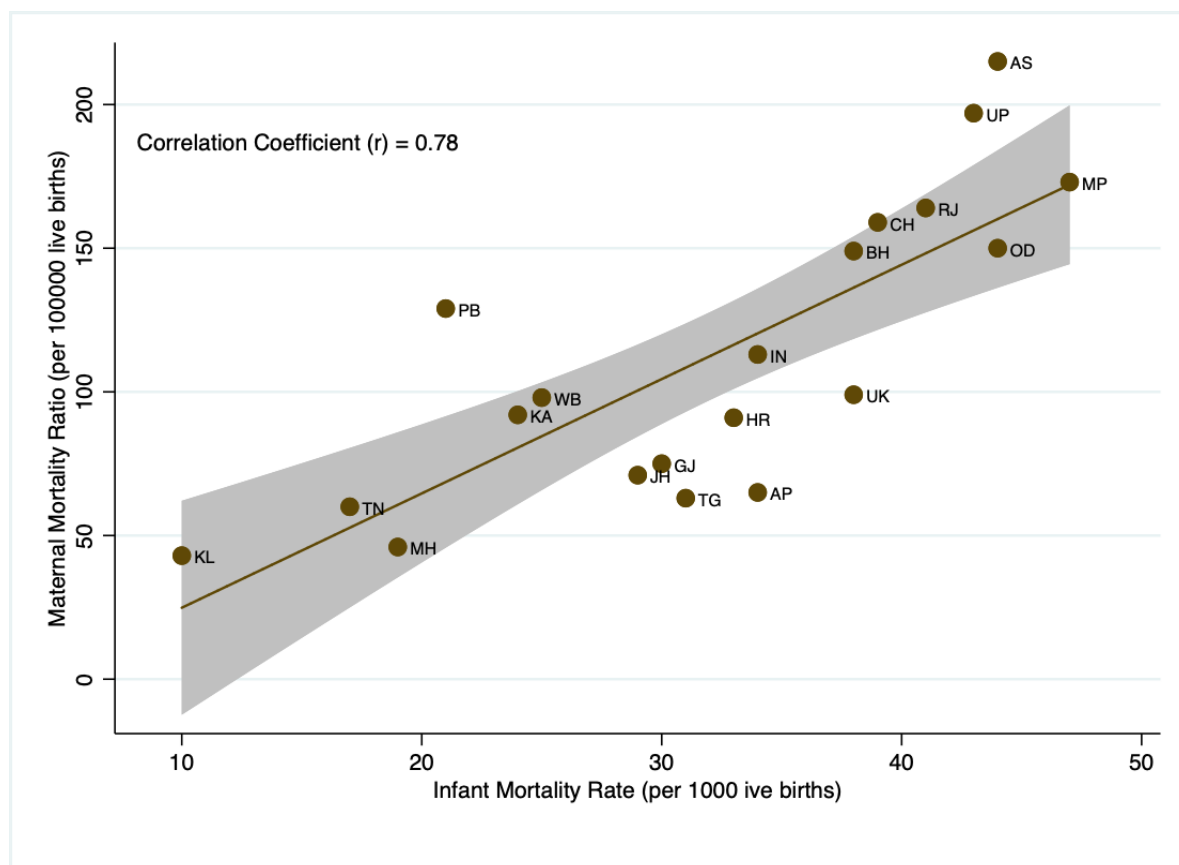

## Tables

Table 1. Description of the study variables

| Variable                       | Definition                                                                                                                                                                                                                                                                                                                                                                                                                                                                                                                                                                                                                                                                                                                                                                   | Data source                                                        |
|--------------------------------|------------------------------------------------------------------------------------------------------------------------------------------------------------------------------------------------------------------------------------------------------------------------------------------------------------------------------------------------------------------------------------------------------------------------------------------------------------------------------------------------------------------------------------------------------------------------------------------------------------------------------------------------------------------------------------------------------------------------------------------------------------------------------|--------------------------------------------------------------------|
| MMR                            | Death of women due to pregnancy or within 42 days of termination of pregnancy, irrespective of the duration and site of the pregnancy, from any cause related to or aggravated by the pregnancy or its management but not from accidental or incidental causes. Maternal Mortality Ratio (MMR) is measured as deaths for 100000 live births.                                                                                                                                                                                                                                                                                                                                                                                                                                 | Authors estimation from HMIS                                       |
| HII                            | Multidimensional measure calculated using information collected for rural health infrastructures on several items: number of district hospitals, Community Health Centers (CHCs), Primary Health Centers (PHCs), Sub-Centers (SCs), doctors, nurses, auxiliary nurse midwife (ANM), accredited Social Health Activist (ASHA), Anganwadi Worker (AWW) per 1000 population. We used the model of HDI for estimating dimension-free numbers then aggregated them to generate Health Infrastructure Index (HII). The HII is adjusted for the share of the urban population in ordered to give weightage to urban health infrastructure (especially private health infrastructure). Weight is equivalent to the share of the urban population in the district.                    | Author's estimation from Rural Health Statistics reports of India. |
| 4 or more ANC's                | Percentage of women who received four or more antenatal care services.                                                                                                                                                                                                                                                                                                                                                                                                                                                                                                                                                                                                                                                                                                       | Authors estimation from NFHS (2015-16)                             |
| PNC's                          | Percentage of women who received postnatal care within 48 hours.                                                                                                                                                                                                                                                                                                                                                                                                                                                                                                                                                                                                                                                                                                             | Authors estimation from NFHS (2015-16)                             |
| Institutional delivery         | Percentage of women delivered a child in hospital settings.                                                                                                                                                                                                                                                                                                                                                                                                                                                                                                                                                                                                                                                                                                                  | Authors estimation from NFHS (2015-16)                             |
| Contraception                  | Percentage of women currently using any modern method of contraception                                                                                                                                                                                                                                                                                                                                                                                                                                                                                                                                                                                                                                                                                                       | Authors estimation from NFHS (2015-16)                             |
| BMI                            | Body Mass Index (BMI) is the height for weight score of adult women in the age group 15-49 years.                                                                                                                                                                                                                                                                                                                                                                                                                                                                                                                                                                                                                                                                            | Authors estimation from NFHS (2015-16)                             |
| Anaemic                        | Haemoglobin levels below (<12 mg/dl for non-pregnant and <11 mg/dl for pregnant) are considered anaemic.                                                                                                                                                                                                                                                                                                                                                                                                                                                                                                                                                                                                                                                                     | Authors estimation from NFHS (2015-16)                             |
| Mean age at first marriage     | Age at first marriage as reported by women in years                                                                                                                                                                                                                                                                                                                                                                                                                                                                                                                                                                                                                                                                                                                          | Authors estimation from NFHS (2015-16)                             |
| Mean age at first birth        | Age at first birth as reported by women in years                                                                                                                                                                                                                                                                                                                                                                                                                                                                                                                                                                                                                                                                                                                             | Authors estimation from NFHS (2015-16)                             |
| Sex ratio at birth (SRB)       | Number of girls per 1000 boys at the time of birth                                                                                                                                                                                                                                                                                                                                                                                                                                                                                                                                                                                                                                                                                                                           | Authors estimation from NFHS (2015-16)                             |
| Mean children ever born (CEB)  | Mean number of children ever born per woman                                                                                                                                                                                                                                                                                                                                                                                                                                                                                                                                                                                                                                                                                                                                  | Authors estimation from NFHS (2015-16)                             |
| 10 or more years of schooling  | Percentage of women who have completed 10 years or more schooling.                                                                                                                                                                                                                                                                                                                                                                                                                                                                                                                                                                                                                                                                                                           | Authors estimation from NFHS (2015-16)                             |
| Average household size         | The average number of persons living in a household                                                                                                                                                                                                                                                                                                                                                                                                                                                                                                                                                                                                                                                                                                                          | Authors estimation from NFHS (2015-16)                             |
| Urban Population               | Share of the urban population in a district                                                                                                                                                                                                                                                                                                                                                                                                                                                                                                                                                                                                                                                                                                                                  | Authors estimation from NFHS (2015-16)                             |
| Poor household economic status | Share of poor households derived from the wealth index. The wealth index is derived by assigning scores based on the number and kinds of consumer goods they own, ranging from a television to a bicycle or car, and housing characteristics such as the source of drinking water, toilet facilities, and flooring materials. These scores are derived using principal component analysis. National wealth quintiles are compiled by assigning the household score to each usual (de jure) household member, ranking each person in the household population by their score, and then dividing the distribution into five equal categories, each with 20 percent of the population. We have considered the first two quintiles as relatively poor households <sup>17</sup> . | Authors estimation from NFHS (2015-16)                             |

Table 2. Descriptive statistics of the study variables

| Variable                               | Obs | Mean   | Std.Dev. | Min   | Max   |
|----------------------------------------|-----|--------|----------|-------|-------|
| Maternal Mortality Ratio               | 639 | 142.21 | 127.84   | 0     | 1671  |
| HII                                    | 640 | 0.540  | 0.37     | 0.09  | 5.55  |
| 4 or more ANCs (%)                     | 640 | 52.46  | 26.01    | 0.85  | 99.14 |
| PNCs within 48 hours of delivery (%)   | 640 | 62.71  | 17.70    | 0.    | 100.  |
| Institutional delivery (%)             | 640 | 80.34  | 16.61    | 10.25 | 100   |
| Contraception (%)                      | 640 | 50.84  | 17.16    | 2.73  | 84.81 |
| Body Mass Index                        | 640 | 17.62  | 8.76     | 1.17  | 45.06 |
| Anaemic (%)                            | 640 | 51.58  | 12.09    | 13.85 | 82.77 |
| Mean age at Marriage                   | 640 | 18.62  | 1.36     | 15.64 | 23.38 |
| Mean age at first birth                | 640 | 20.60  | 1.02     | 18.24 | 24.99 |
| Mean Children Ever Born                | 640 | 2.46   | 0.44     | 1.57  | 3.82  |
| 10 or more years of schooling (%)      | 640 | 28.13  | 14.26    | 5.6   | 86.47 |
| Sex Ratio at Birth                     | 626 | 925.11 | 110.86   | 600   | 1537  |
| Average household size                 | 640 | 5.68   | 0.76     | 3.98  | 8.45  |
| Scheduled Castes/Tribes Population (%) | 640 | 38.16  | 23.27    | 0.70  | 100   |
| Urban Population (%)                   | 640 | 27.33  | 21.66    | 0     | 100   |
| Poor households (%)                    | 640 | 40.65  | 25.73    | 0.12  | 90.55 |

Note: Obs. – observations, Std.Dev.- Standard deviation, Min- Minimum, Max- Maximum, ANC – Antenatal care, PNC – Postnatal care

Table 3. Log-linear regression estimates: correlates of maternal mortality ratio in India

| VARIABLES                         | (1)<br>Model 1       | (2)<br>Model 2       | (3)<br>Model 3       | (4)<br>Model 4       | (5)<br>Model 5       | (6)<br>Model 6       |
|-----------------------------------|----------------------|----------------------|----------------------|----------------------|----------------------|----------------------|
| HII                               |                      | -0.551***<br>(0.106) |                      |                      | -0.494***<br>(0.154) | -0.535***<br>(0.155) |
| 4 or more ANC's                   | -0.273***<br>(0.102) | -0.0477<br>(0.109)   |                      |                      | 0.181<br>(0.134)     | 0.142<br>(0.137)     |
| PNC's within 48 hours of delivery | -0.211<br>(0.162)    | -0.279*<br>(0.159)   |                      |                      | -0.379**<br>(0.157)  | -0.370**<br>(0.158)  |
| Institutional delivery            | 0.323<br>(0.299)     | 0.316<br>(0.293)     |                      |                      | 0.386<br>(0.324)     | 0.485<br>(0.325)     |
| Age at marriage                   |                      |                      | -1.662<br>(2.346)    |                      | -1.241<br>(2.767)    | 0.355<br>(2.848)     |
| Age at first birth                |                      |                      | 7.905**<br>(3.094)   |                      | 8.853**<br>(3.537)   | 7.431**<br>(3.591)   |
| Contraception use                 |                      |                      | 0.219*<br>(0.120)    |                      | 0.152<br>(0.132)     | 0.134<br>(0.132)     |
| Children ever born                |                      |                      | 1.822***<br>(0.332)  |                      | 1.944***<br>(0.444)  | 1.589***<br>(0.596)  |
| BMI                               |                      |                      | 0.437***<br>(0.113)  |                      | 0.406***<br>(0.134)  | 0.357***<br>(0.138)  |
| Anaemic                           |                      |                      | 0.223<br>(0.204)     |                      | 0.303<br>(0.200)     | 0.253<br>(0.201)     |
| 10 or more years of schooling     |                      |                      |                      |                      |                      | -0.437***<br>(0.155) |
| Sex ratio at birth                |                      |                      |                      | -1.218***<br>(0.416) | -1.078***<br>(0.401) | -1.073***<br>(0.400) |
| Average household size            |                      |                      |                      |                      |                      | -0.0438<br>(0.594)   |
| SC/ST population                  |                      |                      |                      | -0.0144<br>(0.0866)  | 0.188**<br>(0.0933)  | 0.146<br>(0.0943)    |
| Urban population                  |                      |                      |                      | 0.0412<br>(0.0767)   | 0.287***<br>(0.0930) | 0.326***<br>(0.0939) |
| Poor household economic status    |                      |                      |                      | 0.215***<br>(0.0565) | 0.0195<br>(0.0810)   | -0.0464<br>(0.0862)  |
| District dummy                    |                      |                      |                      |                      | Yes                  | Yes                  |
| Constant                          | 4.987***<br>(1.010)  | 4.013***<br>(1.008)  | -19.06***<br>(4.442) | 12.03***<br>(2.868)  | -18.74***<br>(5.471) | -17.08***<br>(5.487) |
| Observations                      | 638                  | 638                  | 640                  | 623                  | 621                  | 621                  |
| R-squared                         | 0.018                | 0.058                | 0.110                | 0.042                | 0.176                | 0.187                |

Note: ANC – Antenatal care, PNC – Postnatal care, SC/ST- Scheduled Caste and Tribes, BMI-Body Mass Index; Robust standard errors in parentheses, \*\*\* p<0.01, \*\* p<0.05, \* p<0.1

## Supporting Information

**Supplementary Table 1. STROBE Checklist.** STROBE, strengthening the reporting of observational studies or cross-sectional studies in epidemiology

|                              | <b>Item No</b> | <b>Recommendation</b>                                                                                                                                                                             | <b>Page No</b>   |
|------------------------------|----------------|---------------------------------------------------------------------------------------------------------------------------------------------------------------------------------------------------|------------------|
| <b>Title and abstract</b>    | 1              | (a) Indicate the study’s design with a commonly used term in the title or the abstract                                                                                                            | Page no. 1       |
|                              |                | (b) Provide in the abstract an informative and balanced summary of what was done and what was found                                                                                               | Page no. 1       |
| <b>Introduction</b>          |                |                                                                                                                                                                                                   |                  |
| Background/rationale         | 2              | Explain the scientific background and rationale for the investigation being reported                                                                                                              | Page no. 3       |
| Objectives                   | 3              | State-specific objectives, including any prespecified hypotheses                                                                                                                                  | Page no. 4       |
| <b>Methods</b>               |                |                                                                                                                                                                                                   |                  |
| Study design                 | 4              | Present key elements of study design early in the paper                                                                                                                                           | Page no. 4       |
| Setting                      | 5              | Describe the setting, locations, and relevant dates, including periods of recruitment, exposure, follow-up, and data collection                                                                   | Page no. 4       |
| Participants                 | 6              | (a) Give the eligibility criteria, and the sources and methods of selection of participants                                                                                                       | Page no. 4       |
| Variables                    | 7              | Clearly define all outcomes, exposures, predictors, potential confounders, and effect modifiers. Give diagnostic criteria, if applicable                                                          | Page no. 5       |
| Data sources/<br>measurement | 8*             | For each variable of interest, give sources of data and details of methods of assessment (measurement). Describe comparability of assessment methods if there is more than one group              | Page no. 4 and 5 |
| Bias                         | 9              | Describe any efforts to address potential sources of bias                                                                                                                                         | Page no. 4       |
| Study size                   | 10             | Explain how the study size was arrived at                                                                                                                                                         | Page no. 4       |
| Quantitative variables       | 11             | Explain how quantitative variables were handled in the analyses. If applicable, describe which groupings were chosen and why                                                                      | Page no. 5       |
| Statistical methods          | 12             | (a) Describe all statistical methods, including those used to control for confounding                                                                                                             | Page no. 5 and 6 |
|                              |                | (b) Describe any methods used to examine subgroups and interactions                                                                                                                               | Page no. 5 and 6 |
|                              |                | (c) Explain how missing data were addressed                                                                                                                                                       | Page no. 5 and 6 |
|                              |                | (d) If applicable, describe analytical methods taking account of sampling strategy                                                                                                                | Page no. 5 and 6 |
|                              |                | (e) Describe any sensitivity analyses                                                                                                                                                             | Page no. 8       |
| <b>Results</b>               |                |                                                                                                                                                                                                   |                  |
| Participants                 | 13*            | (a) Report numbers of individuals at each stage of study—eg numbers potentially eligible, examined for eligibility, confirmed eligible, included in the study, completing follow-up, and analysed | NA               |
|                              |                | (b) Give reasons for non-participation at each stage                                                                                                                                              | NA               |



|                          |     |                                                                                                                                                                                                              |                                                      |
|--------------------------|-----|--------------------------------------------------------------------------------------------------------------------------------------------------------------------------------------------------------------|------------------------------------------------------|
|                          |     | (c) Consider use of a flow diagram                                                                                                                                                                           | NA                                                   |
| Descriptive data         | 14* | (a) Give characteristics of study participants (eg demographic, clinical, social) and information on exposures and potential confounders                                                                     | Page no. 6, Table 1 and Table 2                      |
|                          |     | (b) Indicate number of participants with missing data for each variable of interest                                                                                                                          | Page no. 6, Table 1.                                 |
| Outcome data             | 15* | Report numbers of outcome events or summary measures                                                                                                                                                         | Page no. 6, Table 1.                                 |
| Main results             | 16  | (a) Give unadjusted estimates and, if applicable, confounder-adjusted estimates and their precision (eg, 95% confidence interval). Make clear which confounders were adjusted for and why they were included | Page no. 6 to Page no. 9. Table 3 and Figure 1, 2, 3 |
|                          |     | (b) Report category boundaries when continuous variables were categorized                                                                                                                                    | NA                                                   |
|                          |     | (c) If relevant, consider translating estimates of relative risk into absolute risk for a meaningful time period                                                                                             | NA                                                   |
| Other analyses           | 17  | Report other analyses done—eg analyses of subgroups and interactions, and sensitivity analyses                                                                                                               | Page no. 8, Figure 4 and Figure 5.                   |
| <b>Discussion</b>        |     |                                                                                                                                                                                                              |                                                      |
| Key results              | 18  | Summarise key results with reference to study objectives                                                                                                                                                     | Page no. 10                                          |
| Limitations              | 19  | Discuss limitations of the study, taking into account sources of potential bias or imprecision. Discuss both direction and magnitude of any potential bias                                                   | Page no. 10                                          |
| Interpretation           | 20  | Give a cautious overall interpretation of results considering objectives, limitations, multiplicity of analyses, results from similar studies, and other relevant evidence                                   | Page no. 10                                          |
| Generalisability         | 21  | Discuss the generalisability (external validity) of the study results                                                                                                                                        | Page no. 10 and 11                                   |
| <b>Other information</b> |     |                                                                                                                                                                                                              |                                                      |
| Funding                  | 22  | Give the source of funding and the role of the funders for the present study and, if applicable, for the original study on which the present article is based                                                | Page no. 11.                                         |

\*Give information separately for exposed and unexposed groups.

**Note:** An Explanation and Elaboration article discusses each checklist item and gives methodological background and published examples of transparent reporting. The STROBE checklist is best used in conjunction with this article (freely available on the Web sites of PLoS Medicine at <http://www.plosmedicine.org/>, Annals of Internal Medicine at <http://www.annals.org/>, and Epidemiology at <http://www.epidem.com/>). Information on the STROBE Initiative is available at [www.strobe-statement.org](http://www.strobe-statement.org).

**Supplementary Table 2.** State-wise estimates of MMR from SRS and HMIS

| Sr. No | States               | SRS (2014-16) | SRS (2016-18) | HMIS (2017-2019) |
|--------|----------------------|---------------|---------------|------------------|
| 1      | A & N Islands        |               |               | 275              |
| 2      | Andhra Pradesh       | 74            | 65            | 64               |
| 3      | Arunachal Pradesh    |               |               | 284              |
| 4      | Assam                | 237           | 215           | 209              |
| 5      | Bihar                | 165           | 149           | 164              |
| 6      | Chandigarh           |               |               | 15               |
| 7      | Chhattisgarh*        |               | 159           | 144              |
| 8      | Dadra & Nagar Haveli |               |               | 61               |
| 9      | Daman & Diu          |               |               | 48               |
| 10     | Delhi                |               |               | 162              |
| 11     | Goa                  |               |               | 91               |
| 12     | Gujarat              | 91            | 75            | 76               |
| 13     | Haryana              | 101           | 91            | 90               |
| 14     | Himachal Pradesh     |               |               | 127              |
| 15     | Jammu & Kashmir      |               |               | 151              |
| 16     | Jharkhand*           |               | 71            | 78               |
| 17     | Karnataka            | 108           | 92            | 85               |
| 18     | Kerala               | 46            | 43            | 44               |
| 19     | Lakshadweep          |               |               | 208              |
| 20     | Madhya Pradesh       | 173           | 173           | 179              |
| 21     | Maharashtra          | 61            | 46            | 40               |
| 22     | Manipur              |               |               | 282              |
| 23     | Meghalaya            |               |               | 266              |
| 24     | Mizoram              |               |               | 131              |
| 25     | Nagaland             |               |               | 143              |
| 26     | Odisha               | 180           | 150           | 138              |
| 27     | Puducherry           |               |               | 41               |
| 28     | Punjab               | 122           | 129           | 143              |
| 29     | Rajasthan            | 199           | 164           | 162              |
| 30     | Sikkim               |               |               | 228              |
| 31     | Tamil Nadu           | 66            | 60            | 56               |
| 32     | Telangana            | 81            | 63            | 53               |
| 33     | Tripura              |               |               | 119              |
| 34     | Uttar Pradesh        | 201           | 197           | 208              |
| 35     | Uttarakhand*         |               | 99            | 107              |
| 36     | West Bengal          | 101           | 98            | 100              |
|        | INDIA                | 130           | 113           | 122              |

\*Separate MMR estimates for these states are not available as they were merged with their parent states for SRS bulletin 2014-16

**Supplementary Table 3.** District-wise Estimates of MMR from HMIS

| Sr. No. | District                    | State/Union Territory | MMR  |
|---------|-----------------------------|-----------------------|------|
| 1       | Nicobars                    | Andaman & Nicobar     | 101  |
| 2       | North & Middle Andaman      | Andaman & Nicobar     | 605  |
| 3       | South Andaman               | Andaman & Nicobar     | 159  |
| 4       | Anantapur                   | Andhra Pradesh        | 45   |
| 5       | Chittoor                    | Andhra Pradesh        | 57   |
| 6       | East Godavari               | Andhra Pradesh        | 79   |
| 7       | Guntur                      | Andhra Pradesh        | 89   |
| 8       | Krishna                     | Andhra Pradesh        | 74   |
| 9       | Kurnool                     | Andhra Pradesh        | 87   |
| 10      | Prakasam                    | Andhra Pradesh        | 38   |
| 11      | Sri Potti Sriramulu Nellore | Andhra Pradesh        | 40   |
| 12      | Srikakulam                  | Andhra Pradesh        | 32   |
| 13      | Visakhapatnam               | Andhra Pradesh        | 129  |
| 14      | Vizianagaram                | Andhra Pradesh        | 38   |
| 15      | West Godavari               | Andhra Pradesh        | 29   |
| 16      | Y.S.R.                      | Andhra Pradesh        | 40   |
| 17      | Anjaw                       | Arunachal Pradesh     | 0    |
| 18      | Dibang Valley               | Arunachal Pradesh     | 0    |
| 19      | Kurung Kumey                | Arunachal Pradesh     | 0    |
| 20      | Lohit                       | Arunachal Pradesh     | 184  |
| 21      | Lower Dibang Valley         | Arunachal Pradesh     | 336  |
| 22      | Changlang                   | Arunachal Pradesh     | 0    |
| 23      | East Kameng                 | Arunachal Pradesh     | 284  |
| 24      | East Siang                  | Arunachal Pradesh     | 403  |
| 25      | Lower Subansiri             | Arunachal Pradesh     | 0    |
| 26      | Papum Pare                  | Arunachal Pradesh     | 298  |
| 27      | Tawang                      | Arunachal Pradesh     | 364  |
| 28      | Tirap                       | Arunachal Pradesh     | 1671 |
| 29      | Upper Siang                 | Arunachal Pradesh     | 0    |
| 30      | Upper Subansiri             | Arunachal Pradesh     | 247  |
| 31      | West Kameng                 | Arunachal Pradesh     | 256  |
| 32      | West Siang                  | Arunachal Pradesh     | 0    |
| 33      | Baksa                       | Assam                 | 107  |
| 34      | Barpeta                     | Assam                 | 150  |
| 35      | Bongaigaon                  | Assam                 | 139  |
| 36      | Cachar                      | Assam                 | 431  |
| 37      | Chirang                     | Assam                 | 170  |
| 38      | Darrang                     | Assam                 | 120  |
| 39      | Dhemaji                     | Assam                 | 109  |
| 40      | Dhubri                      | Assam                 | 186  |
| 41      | Dibrugarh                   | Assam                 | 379  |
| 42      | Dima Hasao                  | Assam                 | 232  |
| 43      | Goalpara                    | Assam                 | 179  |
| 44      | Golaghat                    | Assam                 | 296  |
| 45      | Hailakandi                  | Assam                 | 169  |
| 46      | Jorhat                      | Assam                 | 170  |
| 47      | Kamrup                      | Assam                 | 409  |

|    |                     |       |     |
|----|---------------------|-------|-----|
| 48 | Kamrup Metropolitan | Assam | 143 |
| 49 | Karbi Anglong       | Assam | 200 |
| 50 | Karimganj           | Assam | 310 |
| 51 | Kokrajhar           | Assam | 365 |
| 52 | Lakhimpur           | Assam | 73  |
| 53 | Morigaon            | Assam | 142 |
| 54 | Nagaon              | Assam | 134 |
| 55 | Nalbari             | Assam | 88  |
| 56 | Sivasagar           | Assam | 141 |
| 57 | Sonitpur            | Assam | 246 |
| 58 | Tinsukia            | Assam | 81  |
| 59 | Udalguri            | Assam | 225 |
| 60 | Araria              | Bihar | 103 |
| 61 | Arwal               | Bihar | 452 |
| 62 | Aurangabad          | Bihar | 98  |
| 63 | Banka               | Bihar | 425 |
| 64 | Begusarai           | Bihar | 61  |
| 65 | Bhagalpur           | Bihar | 787 |
| 66 | Bhojpur             | Bihar | 175 |
| 67 | Buxar               | Bihar | 312 |
| 68 | Darbhanga           | Bihar | 39  |
| 69 | Gaya                | Bihar | 163 |
| 70 | Gopalganj           | Bihar | 145 |
| 71 | Jamui               | Bihar | 197 |
| 72 | Jehanabad           | Bihar | 245 |
| 73 | Kaimur (Bhabua)     | Bihar | 221 |
| 74 | Katihar             | Bihar | 64  |
| 75 | Khagaria            | Bihar | 26  |
| 76 | Kishanganj          | Bihar | 190 |
| 77 | Lakhisarai          | Bihar | 87  |
| 78 | Madhepura           | Bihar | 25  |
| 79 | Madhubani           | Bihar | 112 |
| 80 | Munger              | Bihar | 241 |
| 81 | Muzaffarpur         | Bihar | 83  |
| 82 | Nalanda             | Bihar | 69  |
| 83 | Nawada              | Bihar | 50  |
| 84 | Pashchim Champaran  | Bihar | 64  |
| 85 | Patna               | Bihar | 544 |
| 86 | Purba Champaran     | Bihar | 136 |
| 87 | Purnia              | Bihar | 122 |
| 88 | Rohtas              | Bihar | 137 |
| 89 | Saharsa             | Bihar | 44  |
| 90 | Samastipur          | Bihar | 181 |
| 91 | Saran               | Bihar | 59  |
| 92 | Sheikhpura          | Bihar | 103 |
| 93 | Sheohar             | Bihar | 121 |
| 94 | Sitamarhi           | Bihar | 42  |
| 95 | Siwan               | Bihar | 119 |
| 96 | Supaul              | Bihar | 140 |
| 97 | Vaishali            | Bihar | 47  |

|     |                          |                        |     |
|-----|--------------------------|------------------------|-----|
| 98  | Chandigarh               | Chandigarh             | 15  |
| 99  | Bastar                   | Chhattisgarh           | 248 |
| 100 | Bijapur                  | Chhattisgarh           | 423 |
| 101 | Bilaspur                 | Chhattisgarh           | 121 |
| 102 | Dakshin Bastar Dantewada | Chhattisgarh           | 247 |
| 103 | Dhamtari                 | Chhattisgarh           | 275 |
| 104 | Durg                     | Chhattisgarh           | 98  |
| 105 | Janjgir - Champa         | Chhattisgarh           | 34  |
| 106 | Jashpur                  | Chhattisgarh           | 176 |
| 107 | Kabeerdham               | Chhattisgarh           | 89  |
| 108 | Korba                    | Chhattisgarh           | 121 |
| 109 | Koriya                   | Chhattisgarh           | 234 |
| 110 | Mahasamund               | Chhattisgarh           | 136 |
| 111 | Narayanpur               | Chhattisgarh           | 184 |
| 112 | Raigarh                  | Chhattisgarh           | 202 |
| 113 | Raipur                   | Chhattisgarh           | 143 |
| 114 | Rajnandgaon              | Chhattisgarh           | 164 |
| 115 | Surguja                  | Chhattisgarh           | 211 |
| 116 | Uttar Bastar Kanker      | Chhattisgarh           | 220 |
| 117 | Dadra and Nagar Haveli   | Dadra and Nagar Haveli | 61  |
| 118 | Daman                    | Daman & Diu            | 22  |
| 119 | Diu                      | Daman & Diu            | 122 |
| 120 | Central                  | Delhi                  | 151 |
| 121 | East                     | Delhi                  | 270 |
| 122 | New                      | Delhi                  | 347 |
| 123 | North                    | Delhi                  | 93  |
| 124 | North East               | Delhi                  | 153 |
| 125 | North West               | Delhi                  | 198 |
| 126 | South                    | Delhi                  | 163 |
| 127 | South West               | Delhi                  | 32  |
| 128 | West                     | Delhi                  | 181 |
| 129 | North Goa                | Goa                    | 152 |
| 130 | South Goa                | Goa                    | 15  |
| 131 | Ahmadabad                | Gujarat                | 70  |
| 132 | Amreli                   | Gujarat                | 46  |
| 133 | Anand                    | Gujarat                | 112 |
| 134 | Banas Kantha             | Gujarat                | 46  |
| 135 | Bharuch                  | Gujarat                | 83  |
| 136 | Bhavnagar                | Gujarat                | 55  |
| 137 | Dohad                    | Gujarat                | 50  |
| 138 | Gandhinagar              | Gujarat                | 51  |
| 139 | Jamnagar                 | Gujarat                | 106 |
| 140 | Junagadh                 | Gujarat                | 31  |
| 141 | Kachchh                  | Gujarat                | 95  |
| 142 | Kheda                    | Gujarat                | 49  |
| 143 | Mahesana                 | Gujarat                | 62  |
| 144 | Narmada                  | Gujarat                | 80  |
| 145 | Navsari                  | Gujarat                | 58  |
| 146 | Panch Mahals             | Gujarat                | 101 |
| 147 | Patan                    | Gujarat                | 80  |

|     |               |                  |     |
|-----|---------------|------------------|-----|
| 148 | Porbandar     | Gujarat          | 78  |
| 149 | Rajkot        | Gujarat          | 69  |
| 150 | Sabar Kantha  | Gujarat          | 60  |
| 151 | Surat         | Gujarat          | 54  |
| 152 | Surendranagar | Gujarat          | 71  |
| 153 | Tapi          | Gujarat          | 84  |
| 154 | The Dangs     | Gujarat          | 156 |
| 155 | Vadodara      | Gujarat          | 195 |
| 156 | Valsad        | Gujarat          | 62  |
| 157 | Ambala        | Haryana          | 58  |
| 158 | Bhiwani       | Haryana          | 105 |
| 159 | Faridabad     | Haryana          | 55  |
| 160 | Fatehabad     | Haryana          | 121 |
| 161 | Gurgaon       | Haryana          | 105 |
| 162 | Hisar         | Haryana          | 86  |
| 163 | Jhajjar       | Haryana          | 98  |
| 164 | Jind          | Haryana          | 93  |
| 165 | Kaithal       | Haryana          | 74  |
| 166 | Karnal        | Haryana          | 125 |
| 167 | Kurukshetra   | Haryana          | 82  |
| 168 | Mahendragarh  | Haryana          | 87  |
| 169 | Mewat         | Haryana          | 111 |
| 170 | Palwal        | Haryana          | 120 |
| 171 | Panchkula     | Haryana          | 35  |
| 172 | Panipat       | Haryana          | 101 |
| 173 | Rewari        | Haryana          | 59  |
| 174 | Rohtak        | Haryana          | 117 |
| 175 | Sirsa         | Haryana          | 88  |
| 176 | Sonipat       | Haryana          | 67  |
| 177 | Yamunanagar   | Haryana          | 93  |
| 178 | Bilaspur      | Himachal Pradesh | 183 |
| 179 | Chamba        | Himachal Pradesh | 150 |
| 180 | Hamirpur      | Himachal Pradesh | 64  |
| 181 | Kangra        | Himachal Pradesh | 103 |
| 182 | Kinnaur       | Himachal Pradesh | 0   |
| 183 | Kullu         | Himachal Pradesh | 223 |
| 184 | Lahul & Spiti | Himachal Pradesh | 0   |
| 185 | Mandi         | Himachal Pradesh | 92  |
| 186 | Shimla        | Himachal Pradesh | 109 |
| 187 | Sirmaur       | Himachal Pradesh | 219 |
| 188 | Solan         | Himachal Pradesh | 167 |
| 189 | Una           | Himachal Pradesh | 102 |
| 190 | Anantnag      | J&K              | 97  |
| 191 | Badgam        | J&K              | 194 |
| 192 | Bandipore     | J&K              | 330 |
| 193 | Baramula      | J&K              | 182 |
| 194 | Doda          | J&K              | 15  |
| 195 | Ganderbal     | J&K              | 53  |
| 196 | Jammu         | J&K              | 120 |
| 197 | Kargil        | J&K              | 41  |



|     |                     |           |     |
|-----|---------------------|-----------|-----|
| 198 | Kathua              | J&K       | 57  |
| 199 | Kishtwar            | J&K       | 103 |
| 200 | Kulgam              | J&K       | 218 |
| 201 | Kupwara             | J&K       | 181 |
| 202 | Leh(Ladakh)         | J&K       | 50  |
| 203 | Pulwama             | J&K       | 145 |
| 204 | Punch               | J&K       | 121 |
| 205 | Rajouri             | J&K       | 43  |
| 206 | Ramban              | J&K       | 35  |
| 207 | Reasi               | J&K       | 0   |
| 208 | Samba               | J&K       | 341 |
| 209 | Shupiyan            | J&K       | 962 |
| 210 | Srinagar            | J&K       | 137 |
| 211 | Udhampur            | J&K       | 141 |
| 212 | Bokaro              | Jharkhand | 30  |
| 213 | Chatra              | Jharkhand | 56  |
| 214 | Deoghar             | Jharkhand | 56  |
| 215 | Dhanbad             | Jharkhand | 29  |
| 216 | Dumka               | Jharkhand | 109 |
| 217 | Garhwa              | Jharkhand | 51  |
| 218 | Giridih             | Jharkhand | 39  |
| 219 | Godda               | Jharkhand | 47  |
| 220 | Gumla               | Jharkhand | 158 |
| 221 | Hazaribagh          | Jharkhand | 73  |
| 222 | Jamtara             | Jharkhand | 83  |
| 223 | Khunti              | Jharkhand | 144 |
| 224 | Kodarma             | Jharkhand | 50  |
| 225 | Latehar             | Jharkhand | 115 |
| 226 | Lohardaga           | Jharkhand | 118 |
| 227 | Pakur               | Jharkhand | 126 |
| 228 | Palamu              | Jharkhand | 70  |
| 229 | Pashchimi Singhbhum | Jharkhand | 111 |
| 230 | Purbi Singhbhum     | Jharkhand | 59  |
| 231 | Ramgarh             | Jharkhand | 65  |
| 232 | Ranchi              | Jharkhand | 78  |
| 233 | Sahibganj           | Jharkhand | 77  |
| 234 | Saraikela-Kharsawan | Jharkhand | 77  |
| 235 | Simdega             | Jharkhand | 108 |
| 236 | Bagalkot            | Karnataka | 48  |
| 237 | Bangalore           | Karnataka | 59  |
| 238 | Bangalore Rural     | Karnataka | 78  |
| 239 | Belgaum             | Karnataka | 104 |
| 240 | Bellary             | Karnataka | 155 |
| 241 | Bidar               | Karnataka | 53  |
| 242 | Bijapur             | Karnataka | 55  |
| 243 | Chamarajanagar      | Karnataka | 44  |
| 244 | Chikkaballapura     | Karnataka | 63  |
| 245 | Chikmagalur         | Karnataka | 58  |
| 246 | Chitradurga         | Karnataka | 89  |
| 247 | Dakshina Kannada    | Karnataka | 89  |

|     |                    |                |     |
|-----|--------------------|----------------|-----|
| 248 | Davanagere         | Karnataka      | 108 |
| 249 | Dharwad            | Karnataka      | 209 |
| 250 | Gadag              | Karnataka      | 65  |
| 251 | Gulbarga           | Karnataka      | 165 |
| 252 | Hassan             | Karnataka      | 60  |
| 253 | Haveri             | Karnataka      | 79  |
| 254 | Kodagu             | Karnataka      | 64  |
| 255 | Kolar              | Karnataka      | 56  |
| 256 | Koppal             | Karnataka      | 70  |
| 257 | Mandya             | Karnataka      | 73  |
| 258 | Mysore             | Karnataka      | 85  |
| 259 | Raichur            | Karnataka      | 127 |
| 260 | Ramanagara         | Karnataka      | 81  |
| 261 | Shimoga            | Karnataka      | 95  |
| 262 | Tumkur             | Karnataka      | 86  |
| 263 | Udupi              | Karnataka      | 83  |
| 264 | Uttara Kannada     | Karnataka      | 46  |
| 265 | Yadgir             | Karnataka      | 74  |
| 266 | Alappuzha          | Kerala         | 13  |
| 267 | Ernakulam          | Kerala         | 34  |
| 268 | Idukki             | Kerala         | 45  |
| 269 | Kannur             | Kerala         | 19  |
| 270 | Kasargod           | Kerala         | 24  |
| 271 | Kollam             | Kerala         | 101 |
| 272 | Kottayam           | Kerala         | 118 |
| 273 | Kozhikode          | Kerala         | 65  |
| 274 | Malappuram         | Kerala         | 37  |
| 275 | Palakkad           | Kerala         | 20  |
| 276 | Pathanamthitta     | Kerala         | 13  |
| 277 | Thiruvananthapuram | Kerala         | 28  |
| 278 | Thrissur           | Kerala         | 43  |
| 279 | Wayanad            | Kerala         | 61  |
| 280 | Lakshdweep         | Lakshdweep     | 208 |
| 281 | Alirajpur          | Madhya Pradesh | 191 |
| 282 | Anuppur            | Madhya Pradesh | 392 |
| 283 | Ashoknagar         | Madhya Pradesh | 243 |
| 284 | Balaghat           | Madhya Pradesh | 181 |
| 285 | Barwani            | Madhya Pradesh | 187 |
| 286 | Betul              | Madhya Pradesh | 169 |
| 287 | Bhind              | Madhya Pradesh | 134 |
| 288 | Bhopal             | Madhya Pradesh | 359 |
| 289 | Burhanpur          | Madhya Pradesh | 252 |
| 290 | Chhatarpur         | Madhya Pradesh | 92  |
| 291 | Chhindwara         | Madhya Pradesh | 199 |
| 292 | Damoh              | Madhya Pradesh | 161 |
| 293 | Datia              | Madhya Pradesh | 161 |
| 294 | Dewas              | Madhya Pradesh | 105 |
| 295 | Dhar               | Madhya Pradesh | 131 |
| 296 | Dindori            | Madhya Pradesh | 169 |
| 297 | Guna               | Madhya Pradesh | 80  |

|     |                       |                |     |
|-----|-----------------------|----------------|-----|
| 298 | Gwalior               | Madhya Pradesh | 134 |
| 299 | Harda                 | Madhya Pradesh | 113 |
| 300 | Hoshangabad           | Madhya Pradesh | 102 |
| 301 | Indore                | Madhya Pradesh | 106 |
| 302 | Jabalpur              | Madhya Pradesh | 435 |
| 303 | Jhabua                | Madhya Pradesh | 102 |
| 304 | Katni                 | Madhya Pradesh | 282 |
| 305 | Khandwa (East Nimar)  | Madhya Pradesh | 111 |
| 306 | Khargone (West Nimar) | Madhya Pradesh | 148 |
| 307 | Mandla                | Madhya Pradesh | 208 |
| 308 | Mandsaur              | Madhya Pradesh | 97  |
| 309 | Morena                | Madhya Pradesh | 123 |
| 310 | Narsimhapur           | Madhya Pradesh | 437 |
| 311 | Neemuch               | Madhya Pradesh | 157 |
| 312 | Panna                 | Madhya Pradesh | 206 |
| 313 | Raisen                | Madhya Pradesh | 171 |
| 314 | Rajgarh               | Madhya Pradesh | 81  |
| 315 | Ratlam                | Madhya Pradesh | 89  |
| 316 | Rewa                  | Madhya Pradesh | 181 |
| 317 | Sagar                 | Madhya Pradesh | 235 |
| 318 | Satna                 | Madhya Pradesh | 155 |
| 319 | Sehore                | Madhya Pradesh | 79  |
| 320 | Seoni                 | Madhya Pradesh | 204 |
| 321 | Shahdol               | Madhya Pradesh | 302 |
| 322 | Shajapur              | Madhya Pradesh | 97  |
| 323 | Sheopur               | Madhya Pradesh | 170 |
| 324 | Shivpuri              | Madhya Pradesh | 108 |
| 325 | Sidhi                 | Madhya Pradesh | 219 |
| 326 | Singrauli             | Madhya Pradesh | 149 |
| 327 | Tikamgarh             | Madhya Pradesh | 97  |
| 328 | Ujjain                | Madhya Pradesh | 153 |
| 329 | Umaria                | Madhya Pradesh | 171 |
| 330 | Vidisha               | Madhya Pradesh | 236 |
| 331 | Ahmadnagar            | Maharashtra    | 29  |
| 332 | Akola                 | Maharashtra    | 66  |
| 333 | Amravati              | Maharashtra    | 52  |
| 334 | Aurangabad            | Maharashtra    | 51  |
| 335 | Bhandara              | Maharashtra    | 30  |
| 336 | Bid                   | Maharashtra    | 14  |
| 337 | Buldana               | Maharashtra    | 18  |
| 338 | Chandrapur            | Maharashtra    | 45  |
| 339 | Dhule                 | Maharashtra    | 40  |
| 340 | Gadchiroli            | Maharashtra    | 43  |
| 341 | Gondiya               | Maharashtra    | 37  |
| 342 | Hingoli               | Maharashtra    | 13  |
| 343 | Jalgaon               | Maharashtra    | 22  |
| 344 | Jalna                 | Maharashtra    | 13  |
| 345 | Kolhapur              | Maharashtra    | 38  |
| 346 | Latur                 | Maharashtra    | 19  |
| 347 | Mumbai                | Maharashtra    | 97  |

|     |                  |             |     |
|-----|------------------|-------------|-----|
| 348 | Mumbai Suburban  | Maharashtra | 0   |
| 349 | Nagpur           | Maharashtra | 163 |
| 350 | Nanded           | Maharashtra | 23  |
| 351 | Nandurbar        | Maharashtra | 76  |
| 352 | Nashik           | Maharashtra | 52  |
| 353 | Osmanabad        | Maharashtra | 22  |
| 354 | Parbhani         | Maharashtra | 8   |
| 355 | Pune             | Maharashtra | 49  |
| 356 | Raigarh          | Maharashtra | 36  |
| 357 | Ratnagiri        | Maharashtra | 22  |
| 358 | Sangli           | Maharashtra | 50  |
| 359 | Satara           | Maharashtra | 31  |
| 360 | Sindhudurg       | Maharashtra | 62  |
| 361 | Solapur          | Maharashtra | 29  |
| 362 | Thane            | Maharashtra | 26  |
| 363 | Wardha           | Maharashtra | 97  |
| 364 | Washim           | Maharashtra | 7   |
| 365 | Yavatmal         | Maharashtra | 35  |
| 366 | Bishnupur        | Manipur     | 255 |
| 367 | Chandel          | Manipur     | 150 |
| 368 | Churachandpur    | Manipur     | 147 |
| 369 | Imphal East      | Manipur     | 80  |
| 370 | Imphal West      | Manipur     | 317 |
| 371 | Senapati         | Manipur     | 207 |
| 372 | Tamenglong       | Manipur     | 529 |
| 373 | Thoubal          | Manipur     | 97  |
| 374 | Ukhrul           | Manipur     | 332 |
| 375 | East Garo Hills  | Meghalaya   | 311 |
| 376 | East Khasi Hills | Meghalaya   | 200 |
| 377 | Jaintia Hills    | Meghalaya   | 212 |
| 378 | Ribhoi           | Meghalaya   | 227 |
| 379 | South Garo Hills | Meghalaya   | 590 |
| 380 | West Garo Hills  | Meghalaya   | 317 |
| 381 | West Khasi Hills | Meghalaya   | 253 |
| 382 | Aizawl           | Mizoram     | 97  |
| 383 | Champhai         | Mizoram     | 335 |
| 384 | Kolasib          | Mizoram     | 40  |
| 385 | Lawngtlai        | Mizoram     | 195 |
| 386 | Lunglei          | Mizoram     | 113 |
| 387 | Mamit            | Mizoram     | 40  |
| 388 | Saiha            | Mizoram     | 220 |
| 389 | Serchhip         | Mizoram     | 67  |
| 390 | Dimapur          | Nagaland    | 217 |
| 391 | Kiphire          | Nagaland    | 192 |
| 392 | Kohima           | Nagaland    | 133 |
| 393 | Longleng         | Nagaland    | 99  |
| 394 | Mokokchung       | Nagaland    | 132 |
| 395 | Mon              | Nagaland    | 58  |
| 396 | Peren            | Nagaland    | 54  |
| 397 | Phek             | Nagaland    | 194 |

|     |                 |            |     |
|-----|-----------------|------------|-----|
| 398 | Tuensang        | Nagaland   | 88  |
| 399 | Wokha           | Nagaland   | 156 |
| 400 | Zunheboto       | Nagaland   | 152 |
| 401 | Anugul          | Odisha     | 197 |
| 402 | Balangir        | Odisha     | 122 |
| 403 | Baleshwar       | Odisha     | 108 |
| 404 | Bargarh         | Odisha     | 77  |
| 405 | Baudh           | Odisha     | 81  |
| 406 | Bhadrak         | Odisha     | 48  |
| 407 | Cuttack         | Odisha     | 122 |
| 408 | Debagarh        | Odisha     | 158 |
| 409 | Dhenkanal       | Odisha     | 78  |
| 410 | Gajapati        | Odisha     | 168 |
| 411 | Ganjam          | Odisha     | 186 |
| 412 | Jagatsinghapur  | Odisha     | 83  |
| 413 | Jajapur         | Odisha     | 98  |
| 414 | Jharsuguda      | Odisha     | 65  |
| 415 | Kalahandi       | Odisha     | 203 |
| 416 | Kandhamal       | Odisha     | 287 |
| 417 | Kendrapara      | Odisha     | 97  |
| 418 | Kendujhar       | Odisha     | 69  |
| 419 | Khordha         | Odisha     | 45  |
| 420 | Koraput         | Odisha     | 260 |
| 421 | Malkangiri      | Odisha     | 286 |
| 422 | Mayurbhanj      | Odisha     | 139 |
| 423 | Nabarangapur    | Odisha     | 223 |
| 424 | Nayagarh        | Odisha     | 122 |
| 425 | Nuapada         | Odisha     | 301 |
| 426 | Puri            | Odisha     | 88  |
| 427 | Rayagada        | Odisha     | 180 |
| 428 | Sambalpur       | Odisha     | 327 |
| 429 | Subarnapur      | Odisha     | 255 |
| 430 | Sundargarh      | Odisha     | 111 |
| 431 | Karaikal        | Puducherry | 32  |
| 432 | Mahe            | Puducherry | 49  |
| 433 | Pudducherry     | Puducherry | 45  |
| 434 | Yanam           | Puducherry | 0   |
| 435 | Amritsar        | Punjab     | 310 |
| 436 | Barnala         | Punjab     | 89  |
| 437 | Bathinda        | Punjab     | 104 |
| 438 | Faridkot        | Punjab     | 429 |
| 439 | Fatehgarh Sahib | Punjab     | 159 |
| 440 | Firozpur        | Punjab     | 195 |
| 441 | Gurdaspur       | Punjab     | 70  |
| 442 | Hoshiarpur      | Punjab     | 44  |
| 443 | Jalandhar       | Punjab     | 63  |
| 444 | Kapurthala      | Punjab     | 71  |
| 445 | Ludhiana        | Punjab     | 85  |
| 446 | Mansa           | Punjab     | 80  |
| 447 | Moga            | Punjab     | 44  |

|     |                            |            |     |
|-----|----------------------------|------------|-----|
| 448 | Muktsar                    | Punjab     | 133 |
| 449 | Patiala                    | Punjab     | 212 |
| 450 | Rupnagar                   | Punjab     | 109 |
| 451 | Sahibzada Ajit Singh Nagar | Punjab     | 155 |
| 452 | Sangrur                    | Punjab     | 64  |
| 453 | Shahid Bhagat Singh Nagar  | Punjab     | 105 |
| 454 | Tarn Taran                 | Punjab     | 35  |
| 455 | Ajmer                      | Rajasthan  | 179 |
| 456 | Alwar                      | Rajasthan  | 158 |
| 457 | Banswara                   | Rajasthan  | 243 |
| 458 | Baran                      | Rajasthan  | 174 |
| 459 | Barmer                     | Rajasthan  | 123 |
| 460 | Bharatpur                  | Rajasthan  | 160 |
| 461 | Bhilwara                   | Rajasthan  | 96  |
| 462 | Bikaner                    | Rajasthan  | 128 |
| 463 | Bundi                      | Rajasthan  | 133 |
| 464 | Chittaurgarh               | Rajasthan  | 123 |
| 465 | Churu                      | Rajasthan  | 198 |
| 466 | Dausa                      | Rajasthan  | 110 |
| 467 | Dhaulpur                   | Rajasthan  | 208 |
| 468 | Dungarpur                  | Rajasthan  | 220 |
| 469 | Ganganagar                 | Rajasthan  | 104 |
| 470 | Hanumangarh                | Rajasthan  | 110 |
| 471 | Jaipur                     | Rajasthan  | 102 |
| 472 | Jaisalmer                  | Rajasthan  | 67  |
| 473 | Jalor                      | Rajasthan  | 131 |
| 474 | Jhalawar                   | Rajasthan  | 209 |
| 475 | Jhunjhunun                 | Rajasthan  | 166 |
| 476 | Jodhpur                    | Rajasthan  | 170 |
| 477 | Karauli                    | Rajasthan  | 158 |
| 478 | Kota                       | Rajasthan  | 275 |
| 479 | Nagaur                     | Rajasthan  | 120 |
| 480 | Pali                       | Rajasthan  | 208 |
| 481 | Pratapgarh                 | Rajasthan  | 244 |
| 482 | Rajsamand                  | Rajasthan  | 327 |
| 483 | Sawai Madhopur             | Rajasthan  | 136 |
| 484 | Sikar                      | Rajasthan  | 117 |
| 485 | Sirohi                     | Rajasthan  | 273 |
| 486 | Tonk                       | Rajasthan  | 140 |
| 487 | Udaipur                    | Rajasthan  | 298 |
| 488 | East District              | Sikkim     | 202 |
| 489 | North District             | Sikkim     | 376 |
| 490 | South District             | Sikkim     | 309 |
| 491 | West District              | Sikkim     | 152 |
| 492 | Ariyalur                   | Tamil Nadu | 28  |
| 493 | Chennai                    | Tamil Nadu | 76  |
| 494 | Coimbatore                 | Tamil Nadu | 117 |
| 495 | Cuddalore                  | Tamil Nadu | 39  |
| 496 | Dharmapuri                 | Tamil Nadu | 44  |
| 497 | Dindigul                   | Tamil Nadu | 21  |

|     |                 |               |     |
|-----|-----------------|---------------|-----|
| 498 | Erode           | Tamil Nadu    | 43  |
| 499 | Kancheepuram    | Tamil Nadu    | 40  |
| 500 | Kanniyakumari   | Tamil Nadu    | 28  |
| 501 | Karur           | Tamil Nadu    | 9   |
| 502 | Krishnagiri     | Tamil Nadu    | 25  |
| 503 | Madurai         | Tamil Nadu    | 123 |
| 504 | Nagapattinam    | Tamil Nadu    | 25  |
| 505 | Namakkal        | Tamil Nadu    | 22  |
| 506 | Perambalur      | Tamil Nadu    | 59  |
| 507 | Pudukkottai     | Tamil Nadu    | 43  |
| 508 | Ramanathapuram  | Tamil Nadu    | 31  |
| 509 | Salem           | Tamil Nadu    | 91  |
| 510 | Sivaganga       | Tamil Nadu    | 19  |
| 511 | Thanjavur       | Tamil Nadu    | 86  |
| 512 | The Nilgiris    | Tamil Nadu    | 50  |
| 513 | Theni           | Tamil Nadu    | 49  |
| 514 | Thiruvallur     | Tamil Nadu    | 39  |
| 515 | Thiruvarur      | Tamil Nadu    | 80  |
| 516 | Thoothukkudi    | Tamil Nadu    | 53  |
| 517 | Tiruchirappalli | Tamil Nadu    | 92  |
| 518 | Tirunelveli     | Tamil Nadu    | 72  |
| 519 | Tiruppur        | Tamil Nadu    | 28  |
| 520 | Tiruvannamalai  | Tamil Nadu    | 55  |
| 521 | Vellore         | Tamil Nadu    | 37  |
| 522 | Viluppuram      | Tamil Nadu    | 82  |
| 523 | Virudhunagar    | Tamil Nadu    | 38  |
| 524 | Adilabad        | Telangana     | 60  |
| 525 | Hyderabad       | Telangana     | 124 |
| 526 | Karimnagar      | Telangana     | 36  |
| 527 | Khammam         | Telangana     | 95  |
| 528 | Mahbubnagar     | Telangana     | 52  |
| 529 | Medak           | Telangana     | 46  |
| 530 | Nalgonda        | Telangana     | 43  |
| 531 | Nizamabad       | Telangana     | 37  |
| 532 | Rangareddy      | Telangana     | 9   |
| 533 | Warangal        | Telangana     | 49  |
| 534 | Dhalai          | Tripura       | 104 |
| 535 | North Tripura   | Tripura       | 217 |
| 536 | South Tripura   | Tripura       | 100 |
| 537 | West Tripura    | Tripura       | 93  |
| 538 | Agra            | Uttar Pradesh | 182 |
| 539 | Aligarh         | Uttar Pradesh | 128 |
| 540 | Allahabad       | Uttar Pradesh | 276 |
| 541 | Ambedkar Nagar  | Uttar Pradesh | 344 |
| 542 | Auraiya         | Uttar Pradesh | 397 |
| 543 | Azamgarh        | Uttar Pradesh | 122 |
| 544 | Baghpat         | Uttar Pradesh | 140 |
| 545 | Bahraich        | Uttar Pradesh | 140 |
| 546 | Ballia          | Uttar Pradesh | 26  |
| 547 | Balrampur       | Uttar Pradesh | 153 |



|     |                     |               |     |
|-----|---------------------|---------------|-----|
| 548 | Banda               | Uttar Pradesh | 179 |
| 549 | Bara Banki          | Uttar Pradesh | 202 |
| 550 | Bareilly            | Uttar Pradesh | 62  |
| 551 | Basti               | Uttar Pradesh | 226 |
| 552 | Bijnor              | Uttar Pradesh | 161 |
| 553 | Budaun              | Uttar Pradesh | 264 |
| 554 | Bulandshahr         | Uttar Pradesh | 149 |
| 555 | Chandauli           | Uttar Pradesh | 158 |
| 556 | Chitrakoot          | Uttar Pradesh | 147 |
| 557 | Deoria              | Uttar Pradesh | 344 |
| 558 | Etah                | Uttar Pradesh | 487 |
| 559 | Etawah              | Uttar Pradesh | 329 |
| 560 | Faizabad            | Uttar Pradesh | 395 |
| 561 | Farrukhabad         | Uttar Pradesh | 173 |
| 562 | Fatehpur            | Uttar Pradesh | 106 |
| 563 | Firozabad           | Uttar Pradesh | 84  |
| 564 | Gautam Buddha Nagar | Uttar Pradesh | 73  |
| 565 | Ghaziabad           | Uttar Pradesh | 67  |
| 566 | Ghazipur            | Uttar Pradesh | 240 |
| 567 | Gonda               | Uttar Pradesh | 41  |
| 568 | Gorakhpur           | Uttar Pradesh | 272 |
| 569 | Hamirpur            | Uttar Pradesh | 119 |
| 570 | Hardoi              | Uttar Pradesh | 154 |
| 571 | Jalaun              | Uttar Pradesh | 265 |
| 572 | Jaunpur             | Uttar Pradesh | 170 |
| 573 | Jhansi              | Uttar Pradesh | 156 |
| 574 | Jyotiba Phule Nagar | Uttar Pradesh | 375 |
| 575 | Kannauj             | Uttar Pradesh | 185 |
| 576 | Kanpur Dehat        | Uttar Pradesh | 84  |
| 577 | Kanpur Nagar        | Uttar Pradesh | 101 |
| 578 | Kanshiram Nagar     | Uttar Pradesh | 141 |
| 579 | Kaushambi           | Uttar Pradesh | 254 |
| 580 | Kheri               | Uttar Pradesh | 126 |
| 581 | Kushinagar          | Uttar Pradesh | 83  |
| 582 | Lalitpur            | Uttar Pradesh | 261 |
| 583 | Lucknow             | Uttar Pradesh | 971 |
| 584 | Mahamaya Nagar      | Uttar Pradesh | 18  |
| 585 | Mahoba              | Uttar Pradesh | 147 |
| 586 | Mahrajganj          | Uttar Pradesh | 219 |
| 587 | Mainpuri            | Uttar Pradesh | 44  |
| 588 | Mathura             | Uttar Pradesh | 191 |
| 589 | Mau                 | Uttar Pradesh | 329 |
| 590 | Meerut              | Uttar Pradesh | 154 |
| 591 | Mirzapur            | Uttar Pradesh | 90  |
| 592 | Moradabad           | Uttar Pradesh | 152 |
| 593 | Muzaffarnagar       | Uttar Pradesh | 126 |
| 594 | Pilibhit            | Uttar Pradesh | 304 |
| 595 | Pratapgarh          | Uttar Pradesh | 114 |
| 596 | Rae Bareli          | Uttar Pradesh | 107 |
| 597 | Rampur              | Uttar Pradesh | 248 |

|     |                              |               |     |
|-----|------------------------------|---------------|-----|
| 598 | Saharanpur                   | Uttar Pradesh | 160 |
| 599 | Sant Kabir Nagar             | Uttar Pradesh | 236 |
| 600 | Sant Ravidas Nagar (Bhadohi) | Uttar Pradesh | 224 |
| 601 | Shahjahanpur                 | Uttar Pradesh | 118 |
| 602 | Shrawasti                    | Uttar Pradesh | 302 |
| 603 | Siddharthnagar               | Uttar Pradesh | 194 |
| 604 | Sitapur                      | Uttar Pradesh | 278 |
| 605 | Sonbhadra                    | Uttar Pradesh | 312 |
| 606 | Sultanpur                    | Uttar Pradesh | 443 |
| 607 | Unnao                        | Uttar Pradesh | 334 |
| 608 | Varanasi                     | Uttar Pradesh | 218 |
| 609 | Almora                       | Uttarakhand   | 57  |
| 610 | Bageshwar                    | Uttarakhand   | 0   |
| 611 | Chamoli                      | Uttarakhand   | 113 |
| 612 | Champawat                    | Uttarakhand   | 202 |
| 613 | Dehradun                     | Uttarakhand   | 180 |
| 614 | Garhwal                      | Uttarakhand   | 45  |
| 615 | Hardwar                      | Uttarakhand   | 131 |
| 616 | Nainital                     | Uttarakhand   | 82  |
| 617 | Pithoragarh                  | Uttarakhand   | 94  |
| 618 | Rudraprayag                  | Uttarakhand   | 65  |
| 619 | Tehri Garhwal                | Uttarakhand   | 110 |
| 620 | Udham Singh Nagar            | Uttarakhand   | 88  |
| 621 | Uttarkashi                   | Uttarakhand   | 61  |
| 622 | Bankura                      | West Bengal   | 112 |
| 623 | Bardhaman                    | West Bengal   | 104 |
| 624 | Birbhum                      | West Bengal   | 103 |
| 625 | Dakshin Dinajpur             | West Bengal   | 104 |
| 626 | Darjiling                    | West Bengal   | 253 |
| 627 | Haora                        | West Bengal   | 121 |
| 628 | Hugli                        | West Bengal   | 61  |
| 629 | Jalpaiguri                   | West Bengal   | 125 |
| 630 | Koch Bihar                   | West Bengal   | 114 |
| 631 | Kolkata                      | West Bengal   | 146 |
| 632 | Maldah                       | West Bengal   | 97  |
| 633 | Murshidabad                  | West Bengal   | 137 |
| 634 | Nadia                        | West Bengal   | 104 |
| 635 | North Twenty Four Parganas   | West Bengal   | 43  |
| 636 | Paschim Medinipur            | West Bengal   | 70  |
| 637 | Purba Medinipur              | West Bengal   | 38  |
| 638 | Puruliya                     | West Bengal   | 82  |
| 639 | South Twenty Four Parganas   | West Bengal   | 68  |
| 640 | Uttar Dinajpur               | West Bengal   | 77  |

---

**Supplementary Figure 1.** Bivariate LISA (Cluster and Significance) maps depicting spatial clustering and spatial outliers of maternal mortality ratio by selected background characteristics in India

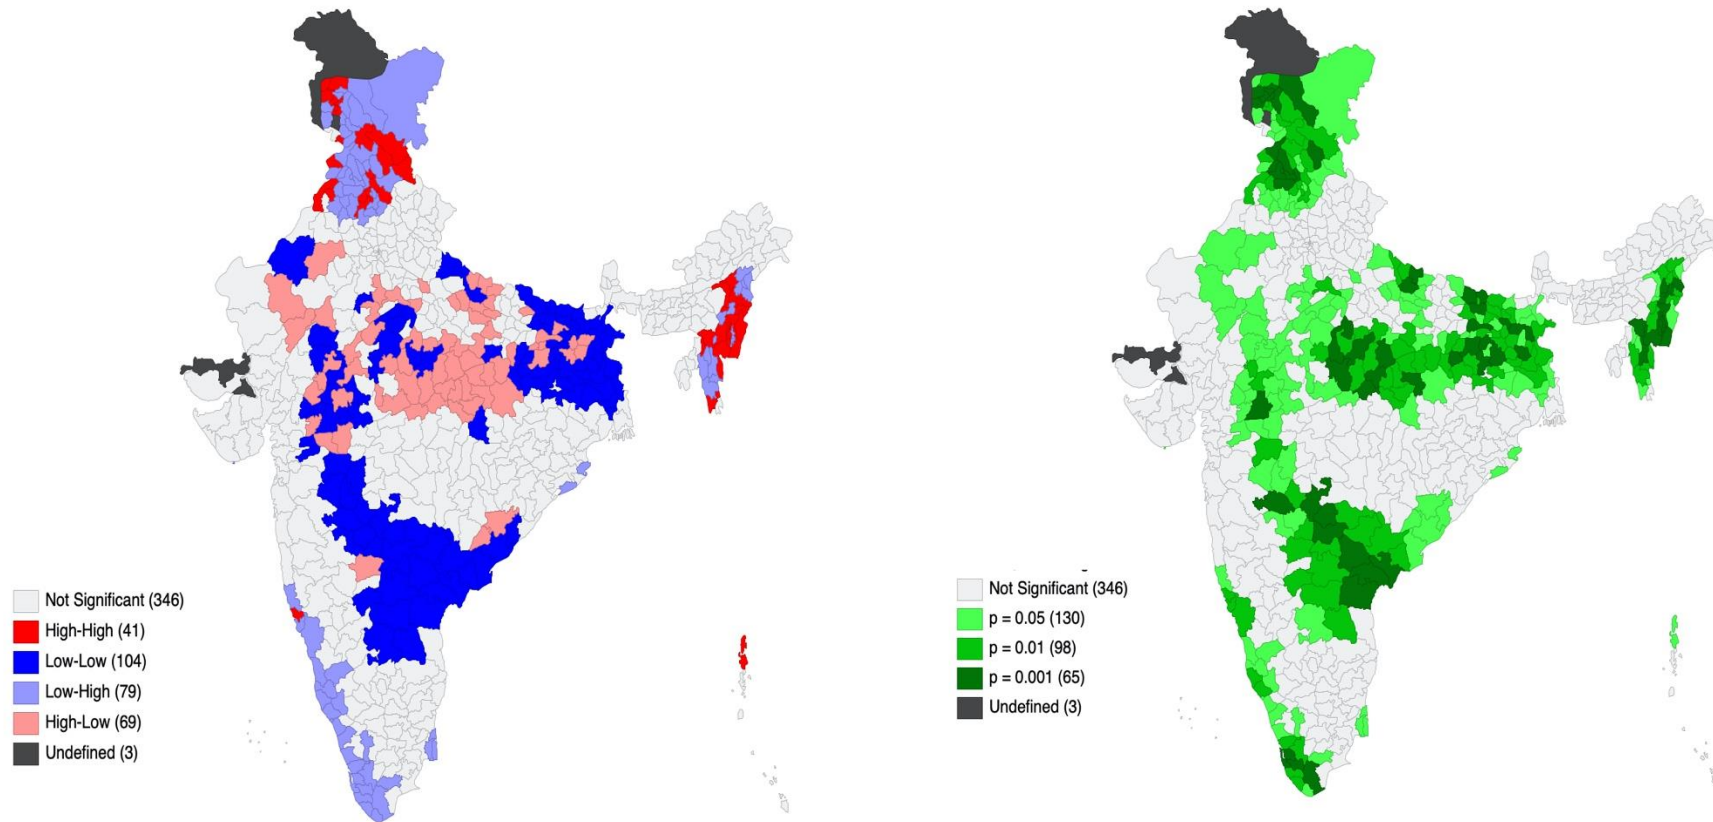

Bivariate LISA (Cluster and Significance) maps depicting spatial clustering and spatial outliers of maternal mortality ratio by mean age at marriage in India (Moran's  $I=0.000$ ,  $p\text{-value}=0.498$ )

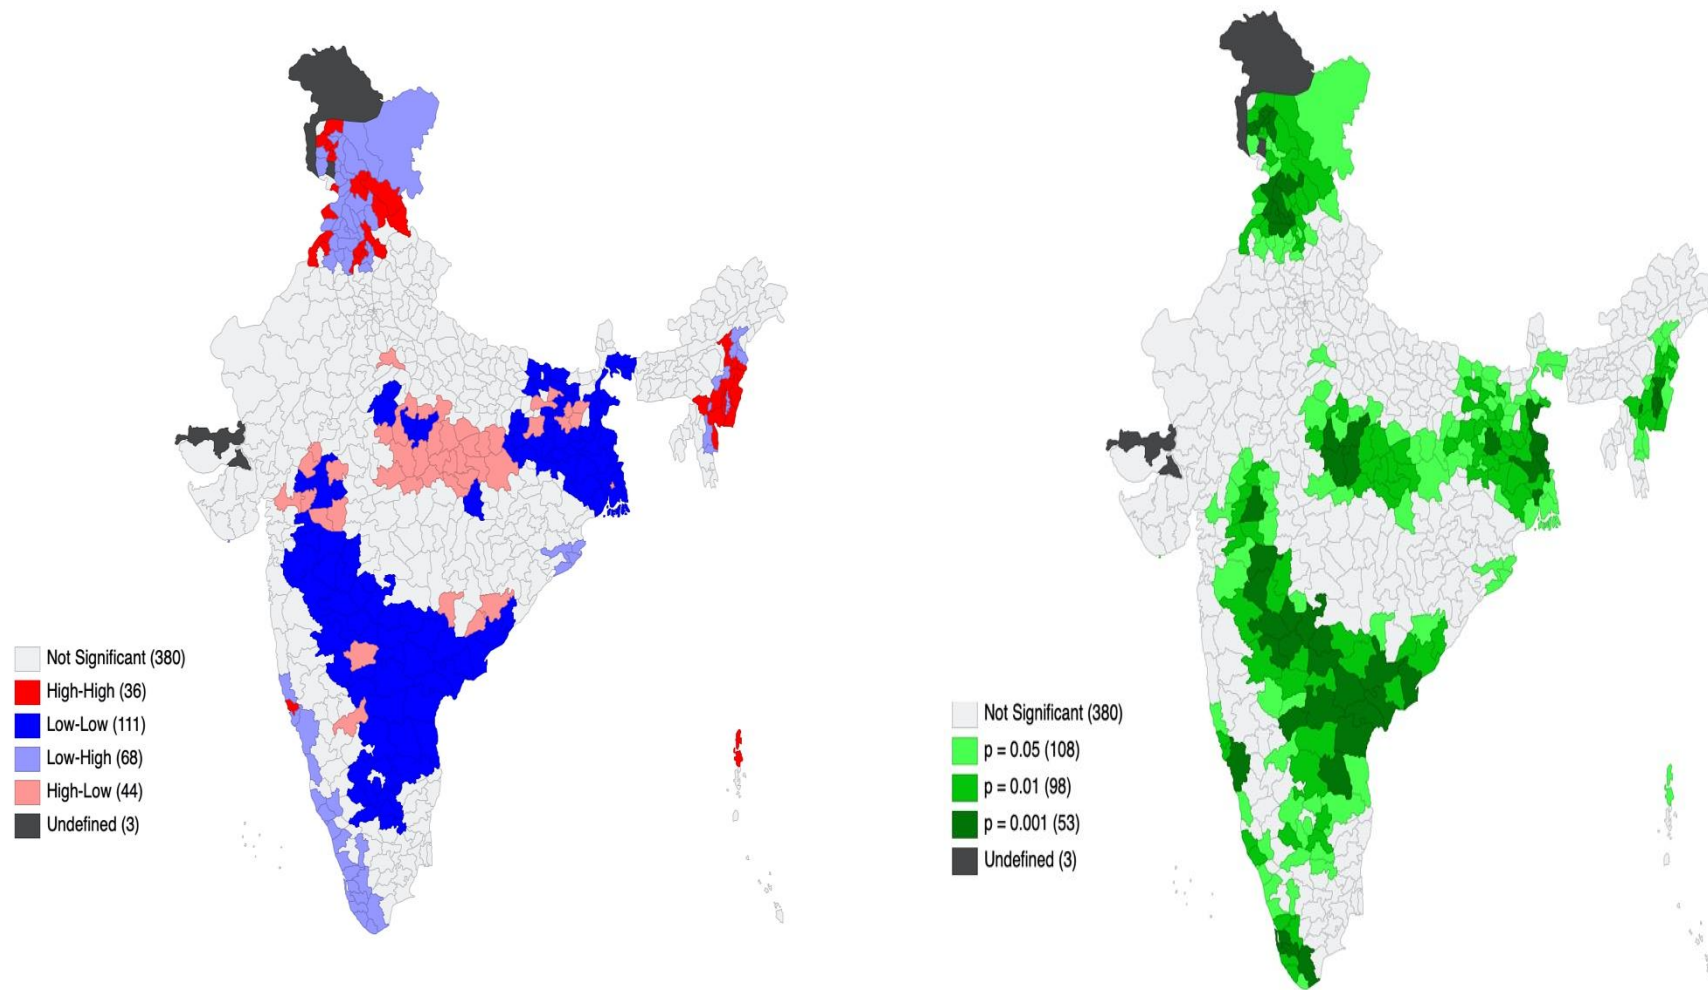

Bivariate LISA (Cluster and Significance) maps depicting spatial clustering and spatial outliers of maternal mortality ratio by mean age at first birth in India (Moran's  $I=0.035$ ,  $p\text{-value}=0.0350$ )

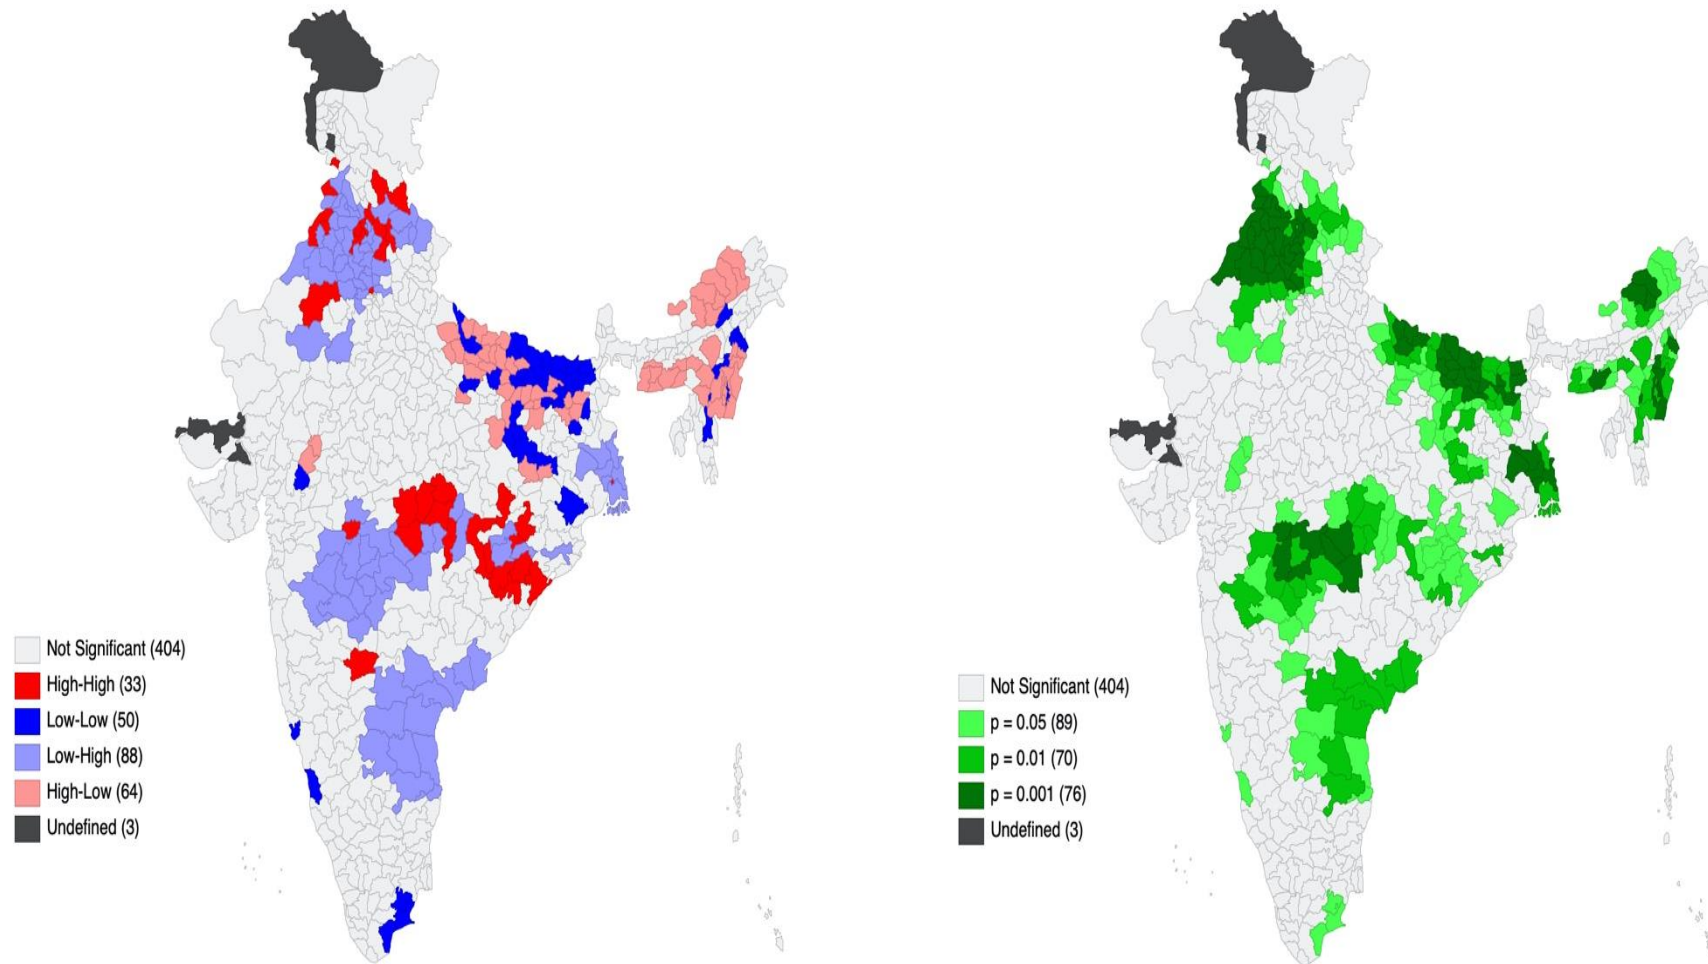

Bivariate LISA (Cluster and Significance) maps depicting spatial clustering and spatial outliers of maternal mortality ratio by contraception use in India (Moran's  $I = -0.166$ ,  $p\text{-value} = 0.001$ )



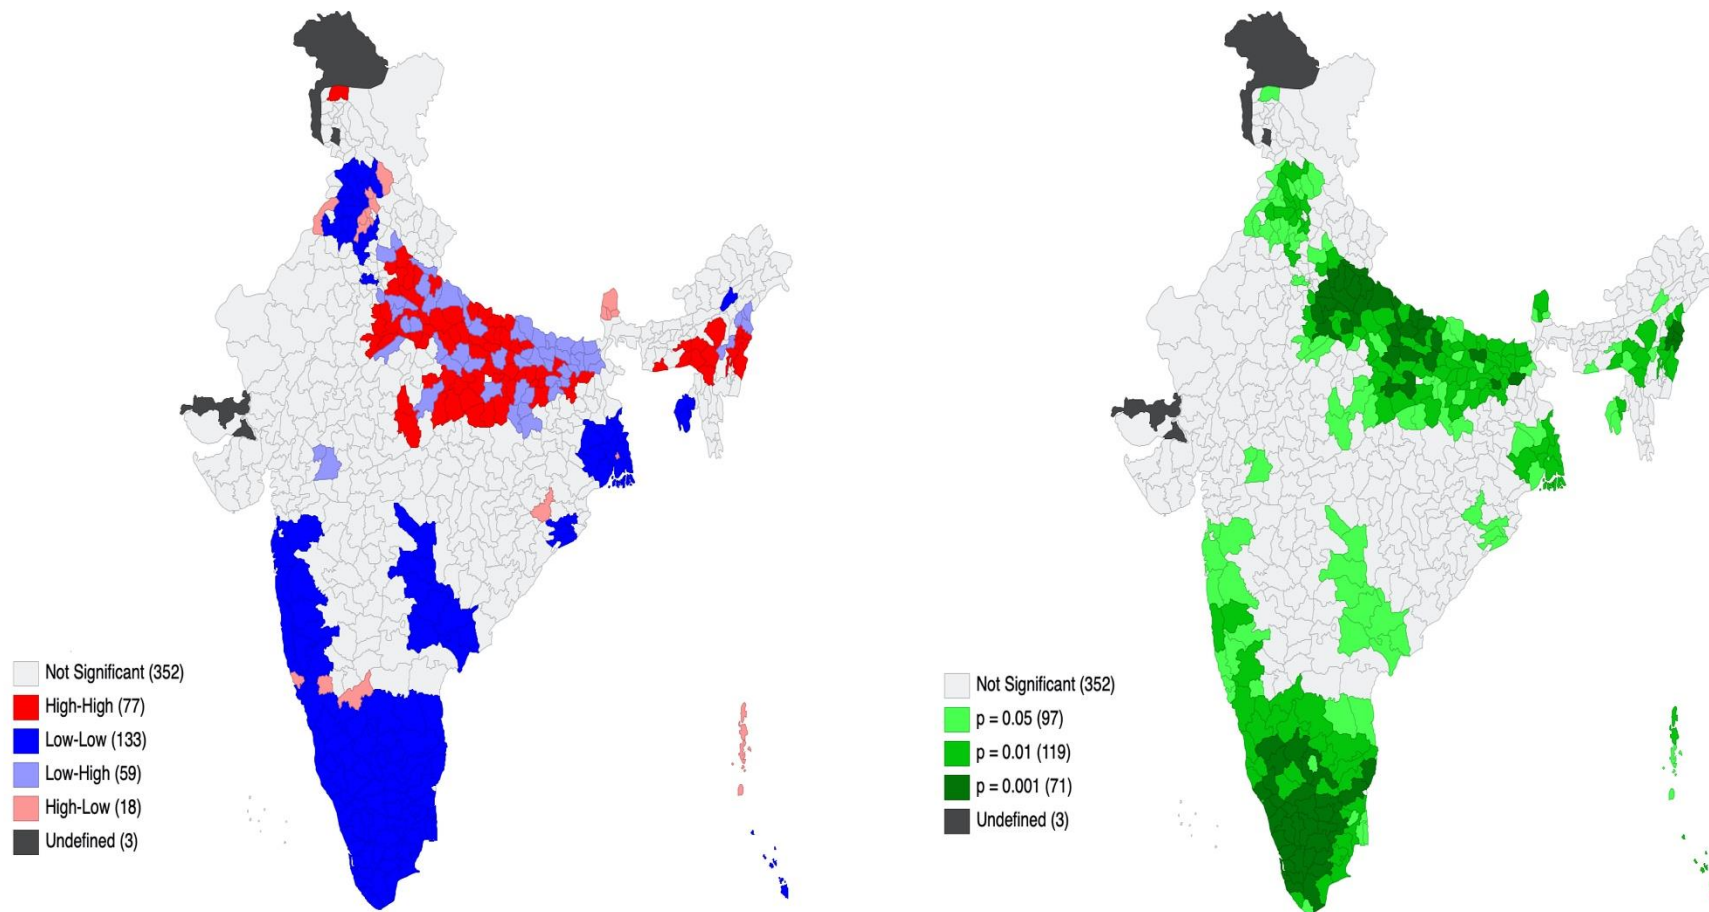

Bivariate LISA (Cluster and Significance) maps depicting spatial clustering and spatial outliers of maternal mortality ratio by mean number of children ever born in India (Moran's  $I=0.258$ ,  $p$ -value= $0.001$ )

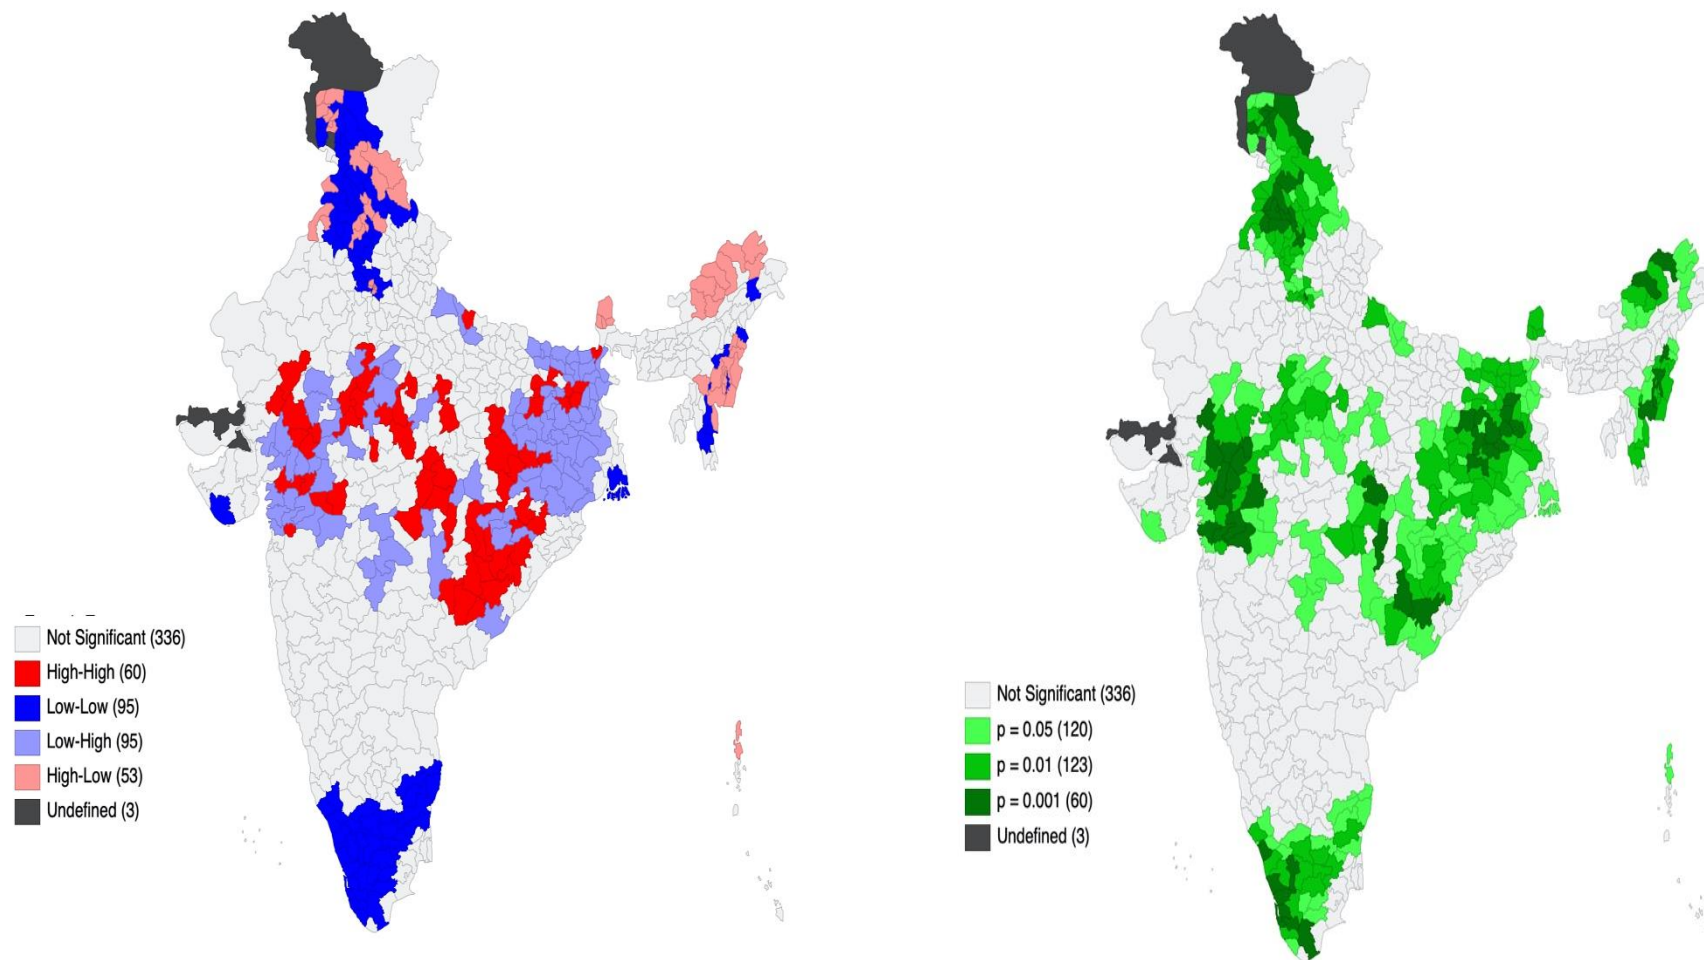

Bivariate LISA (Cluster and Significance) maps depicting spatial clustering and spatial outliers of maternal mortality ratio by percent of women underweight in India (Moran's  $I=0.024$ ,  $p$ -value=0.091)



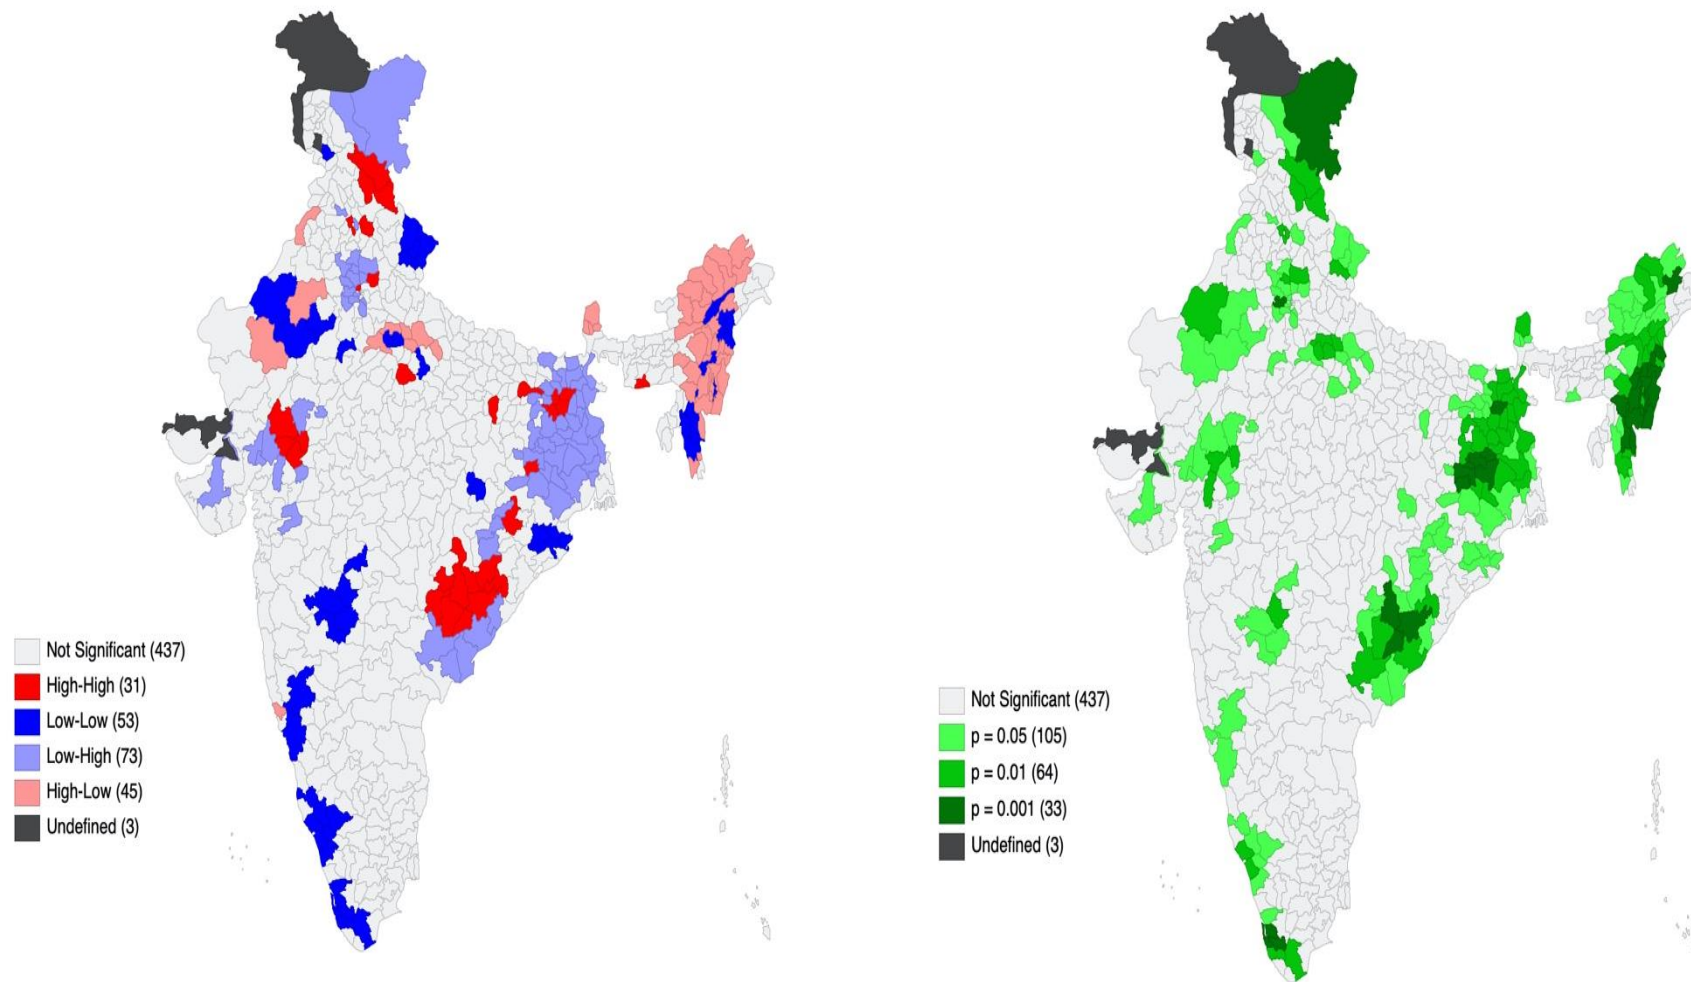

Bivariate LISA (Cluster and Significance) maps depicting spatial clustering and spatial outliers of maternal mortality ratio by percent of anaemic women mean in India (Moran's  $I = -0.045$ ,  $p$ -value = 0.019)

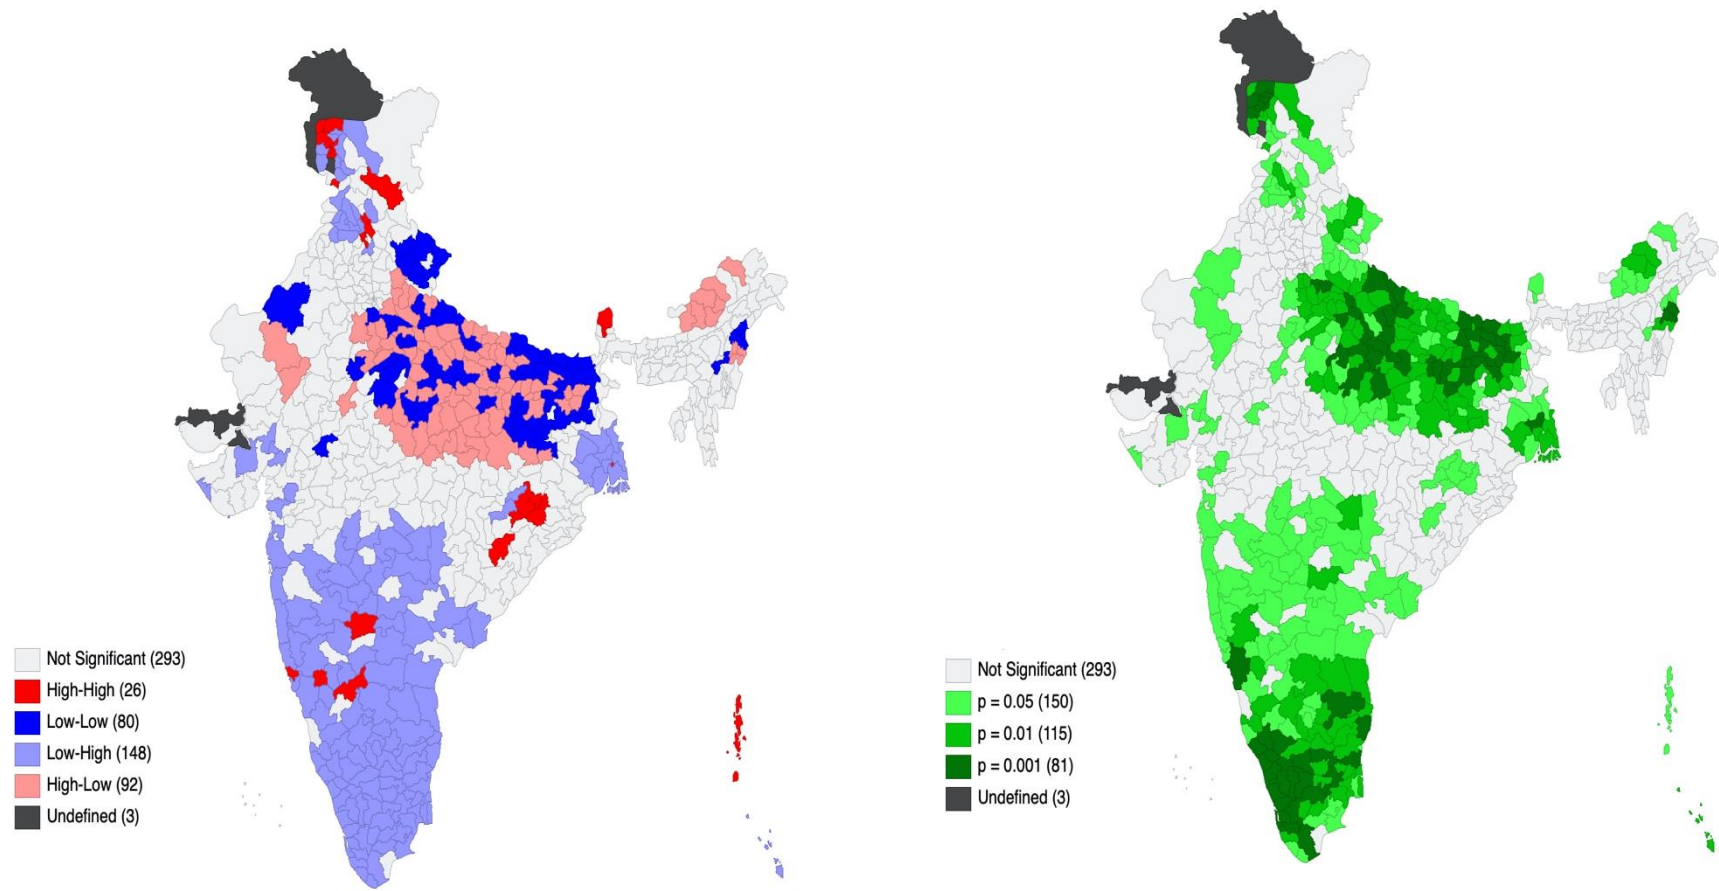

Bivariate LISA (Cluster and Significance) maps depicting spatial clustering and spatial outliers of maternal mortality ratio by percent of women receiving four or more Antenatal care in India (Moran's  $I = -0.241$ ,  $p\text{-value} = 0.001$ )

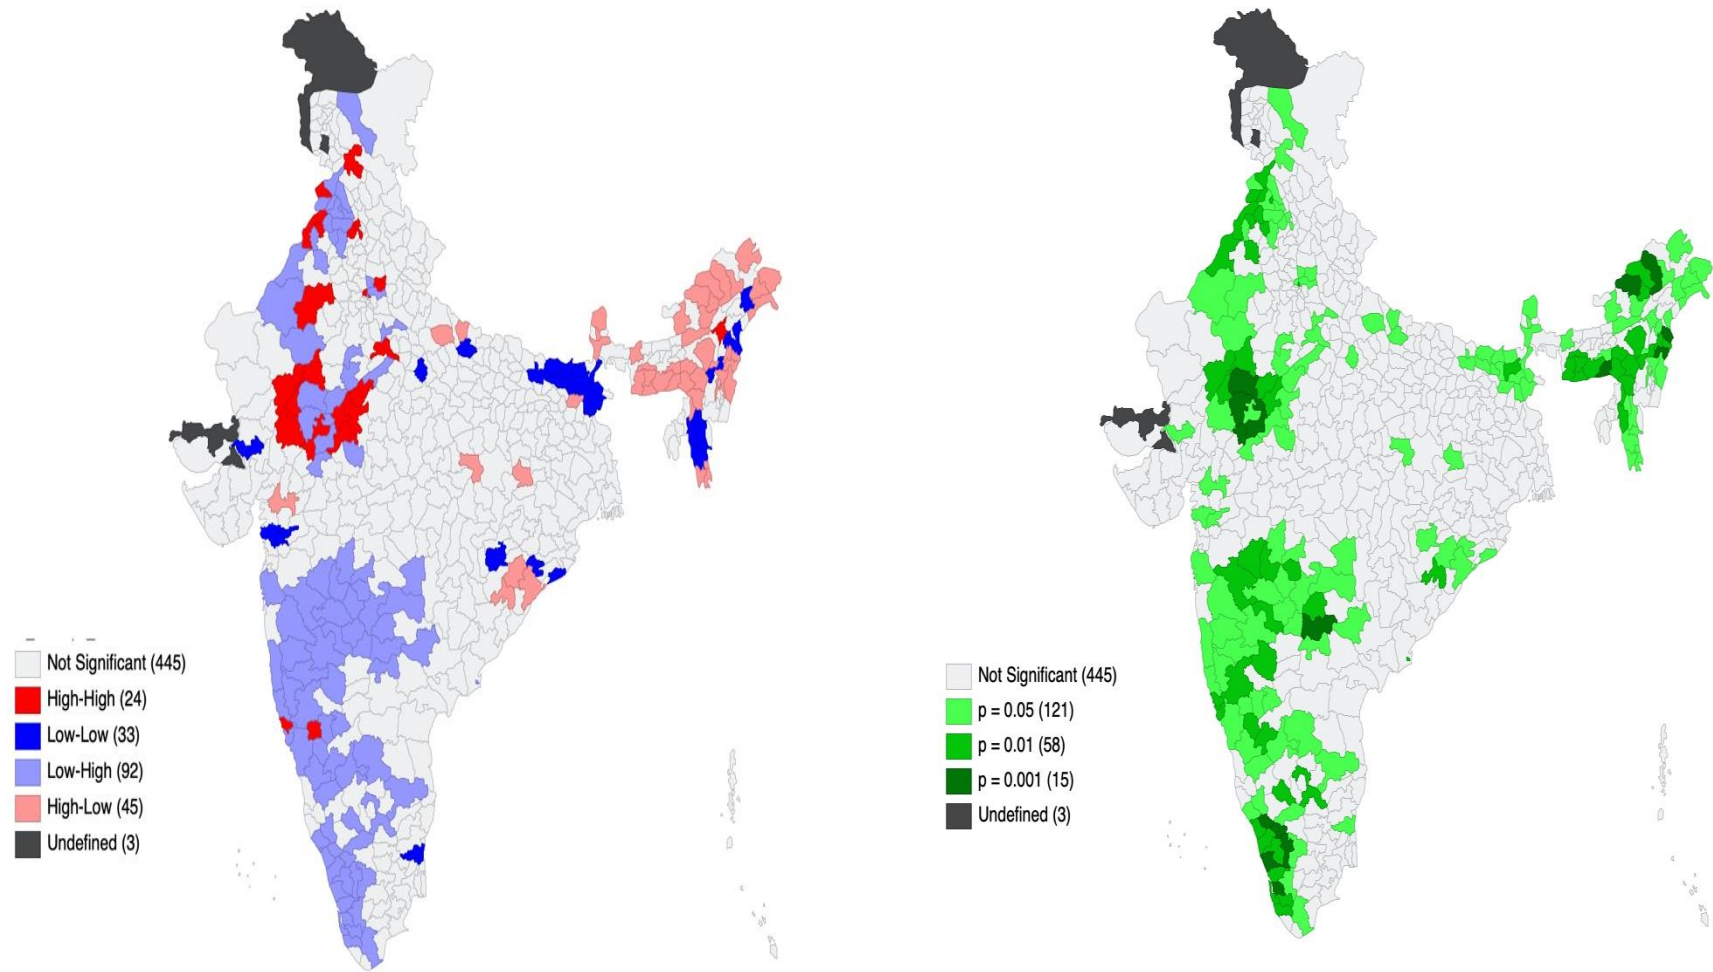

Bivariate LISA (Cluster and Significance) maps depicting spatial clustering and spatial outliers of maternal mortality ratio by percent women receiving Postnatal care in India (Moran's  $I=-0.168$ ,  $p$ -value=0.001)

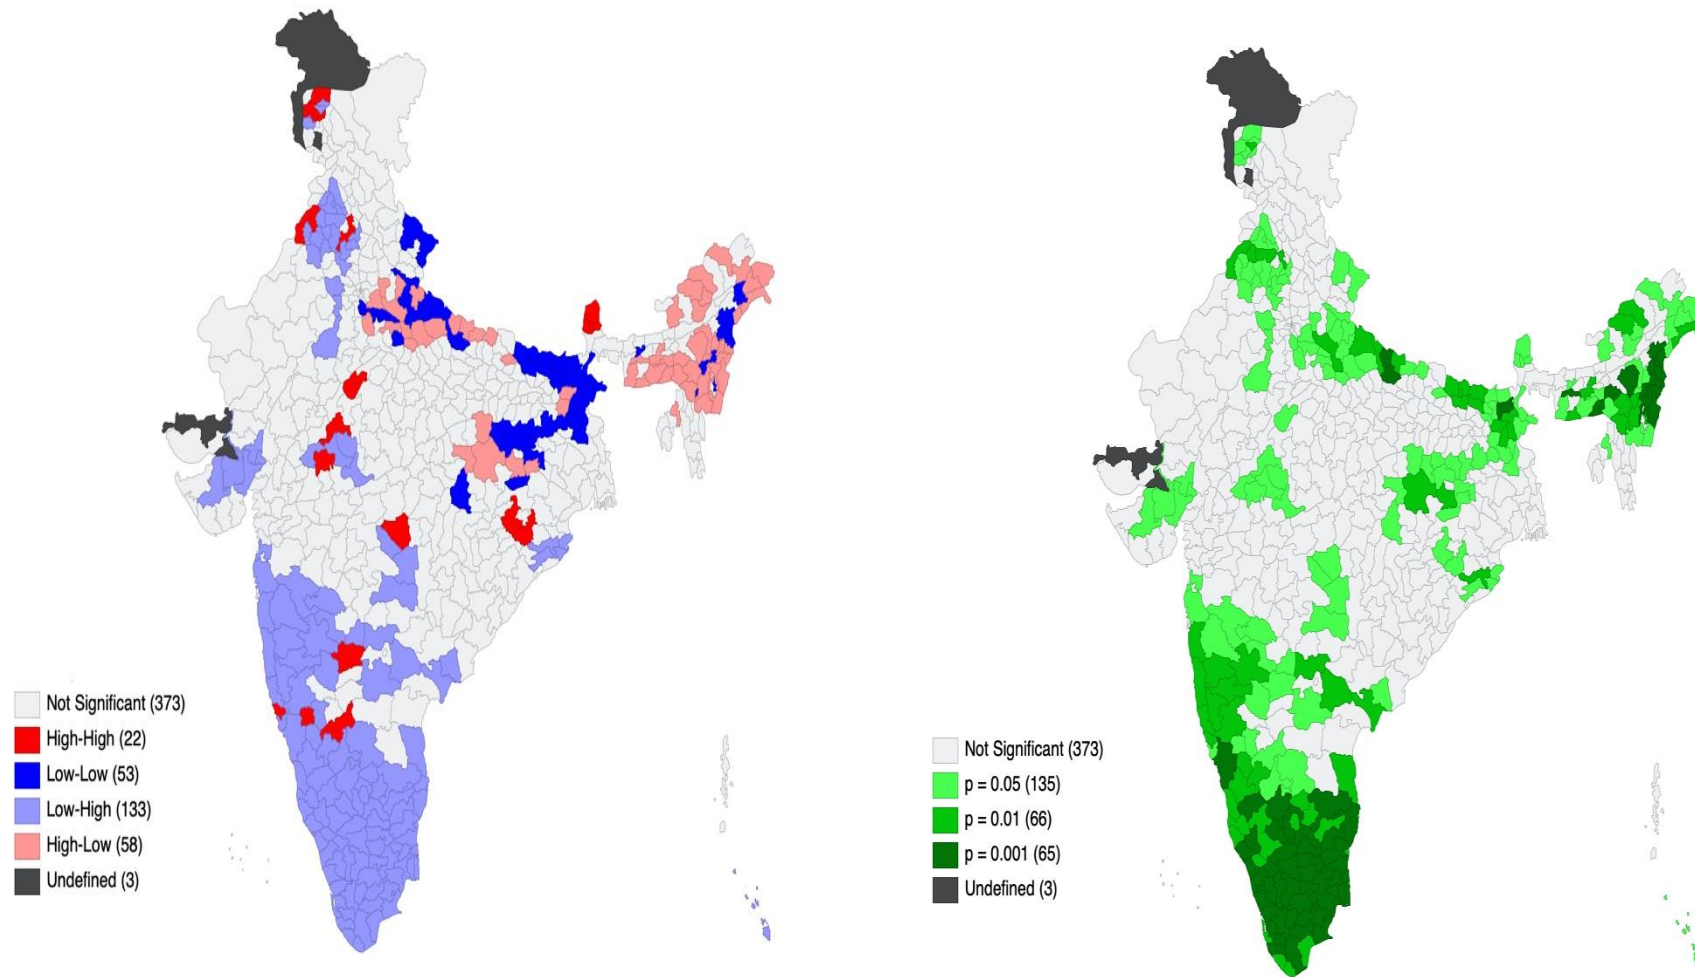

Bivariate LISA (Cluster and Significance) maps depicting spatial clustering and spatial outliers of maternal mortality ratio by percent of institutional delivery in India (Moran's  $I = -0.233$ ,  $p$ -value = 0.001)



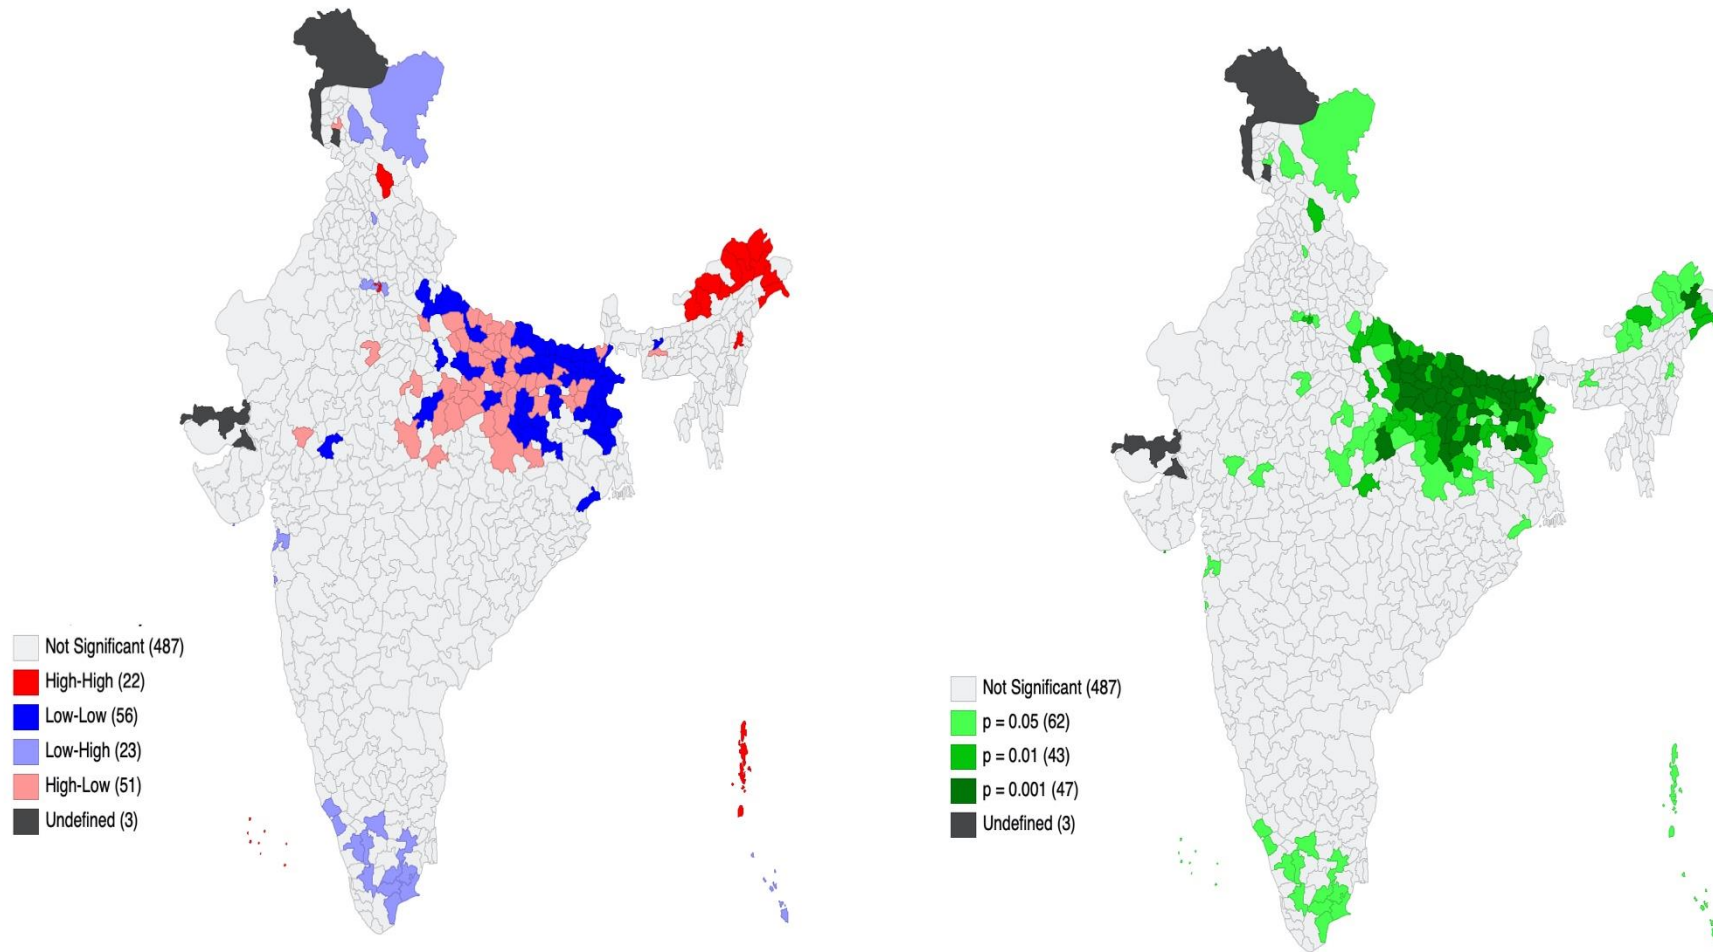

Bivariate LISA (Cluster and Significance) maps depicting spatial clustering and spatial outliers of maternal mortality ratio by healthcare index in India (Moran's  $I=-0.042$ ,  $p$ -value= $0.001$ )

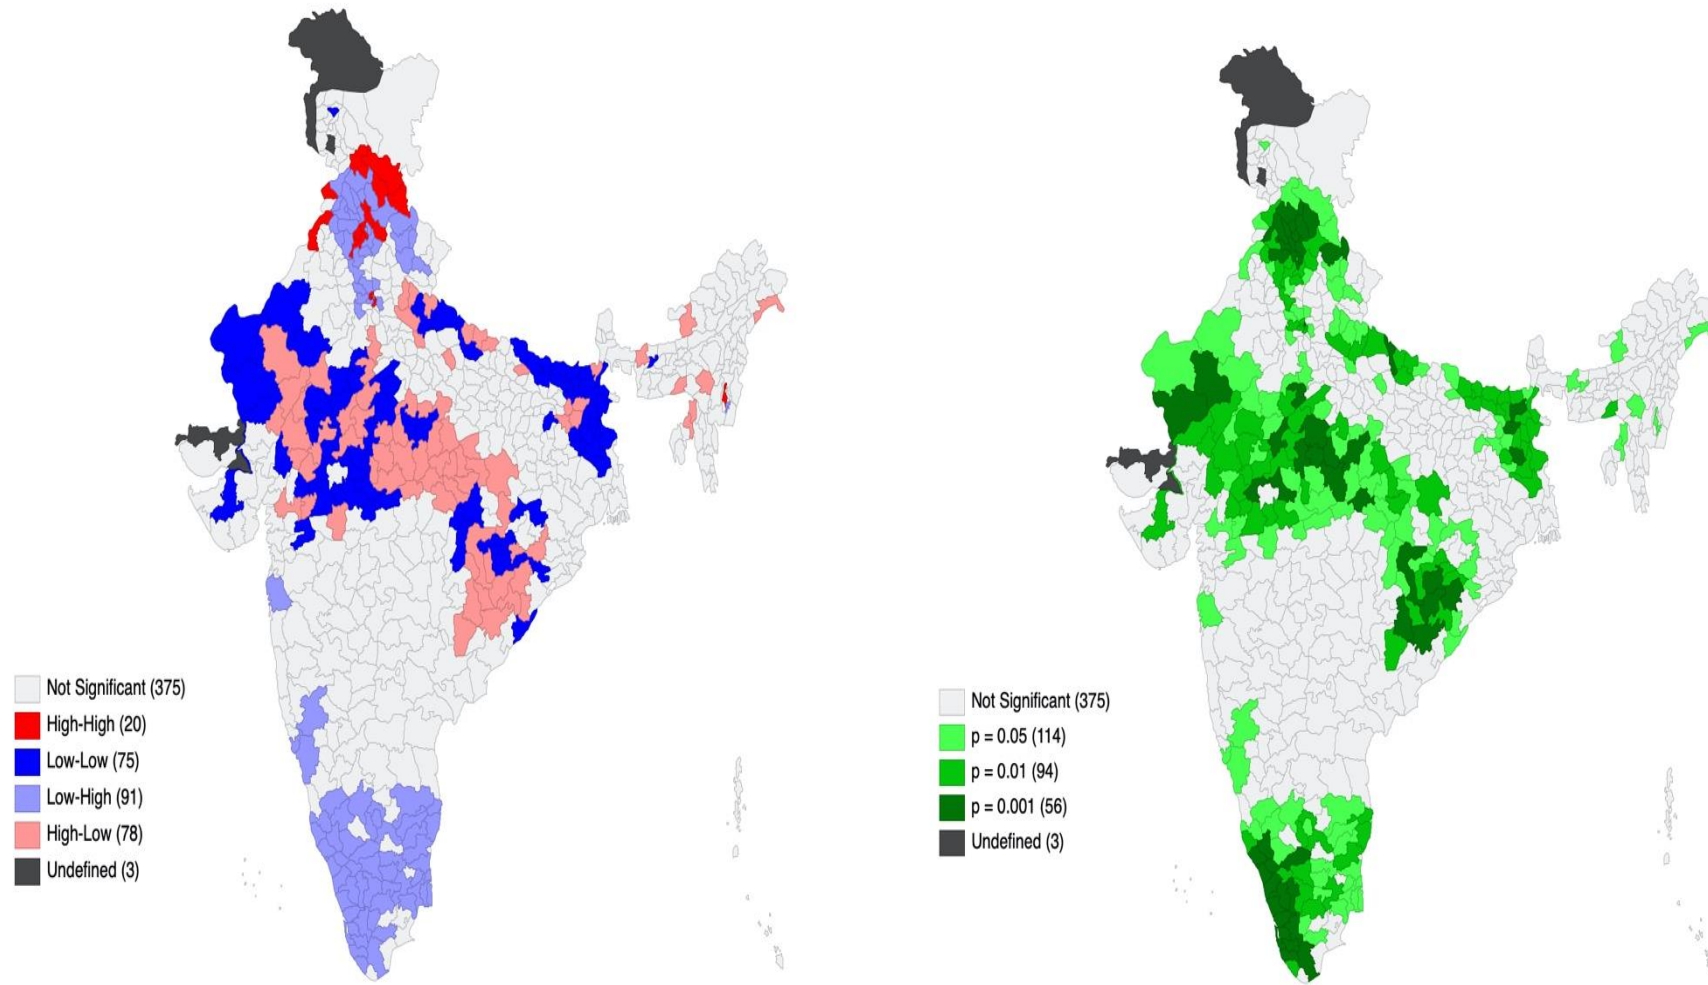

Bivariate LISA (Cluster and Significance) maps depicting spatial clustering and spatial outliers of maternal mortality ratio by percent women with ten or more years of schooling in India (Moran's  $I=-0.017$ ,  $p$ -value= $0.001$ )

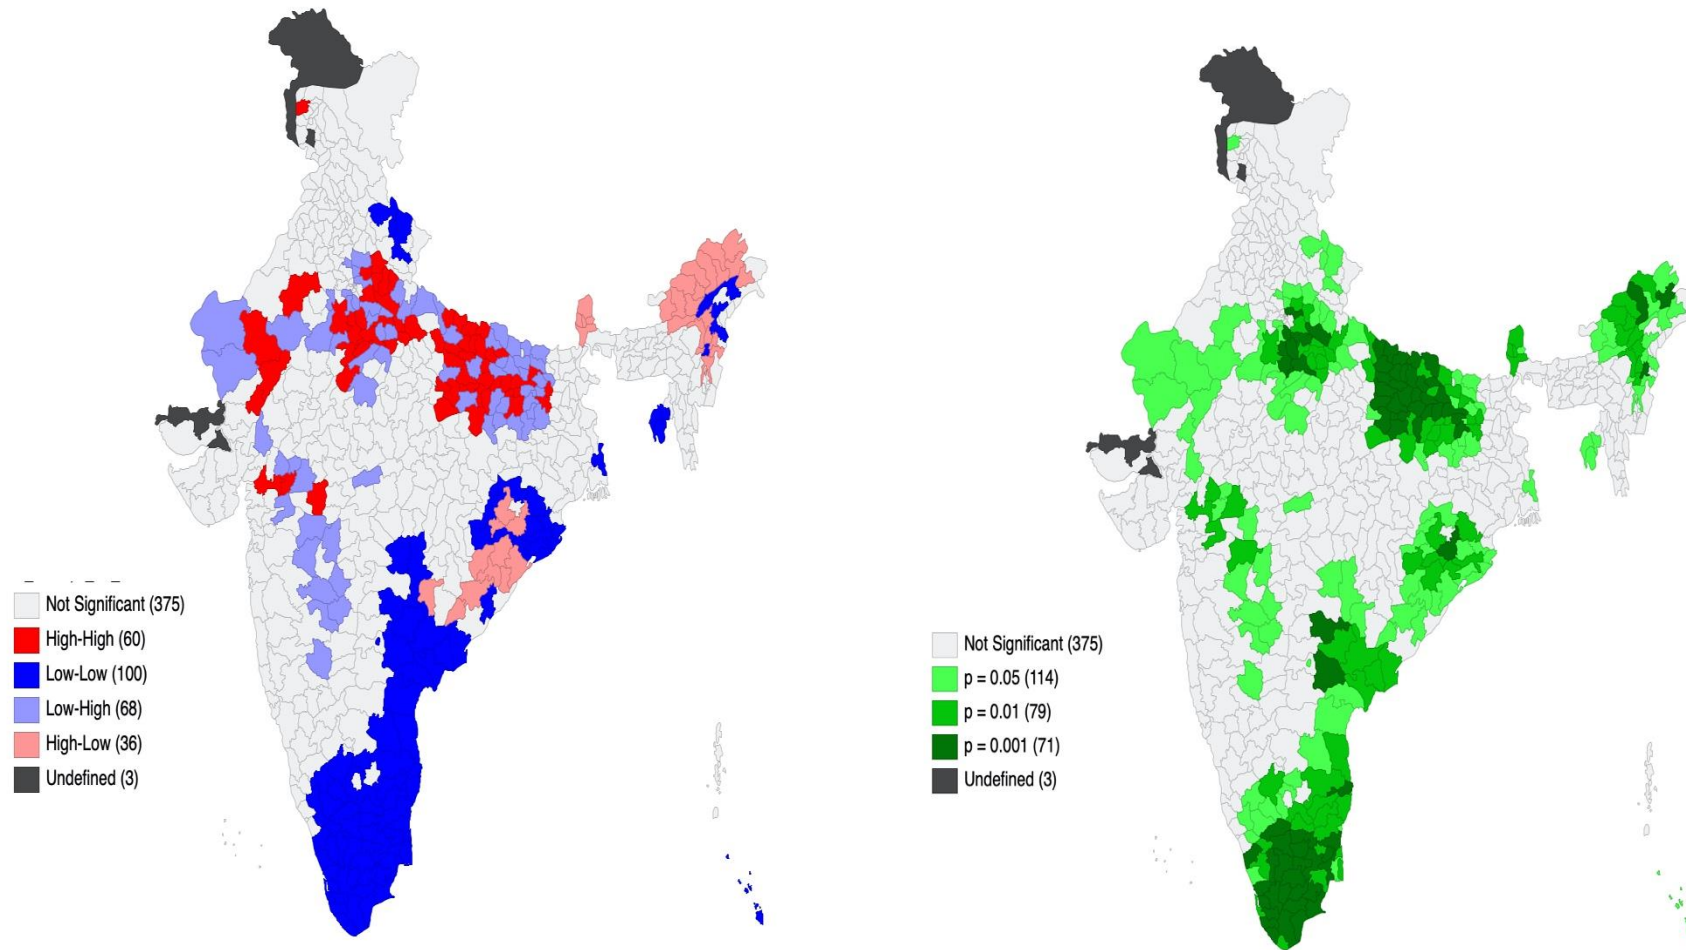

Bivariate LISA (Cluster and Significance) maps depicting spatial clustering and spatial outliers of maternal mortality ratio by average household size in India (Moran's  $I=0.110$ ,  $p$ -value= $0.001$ )



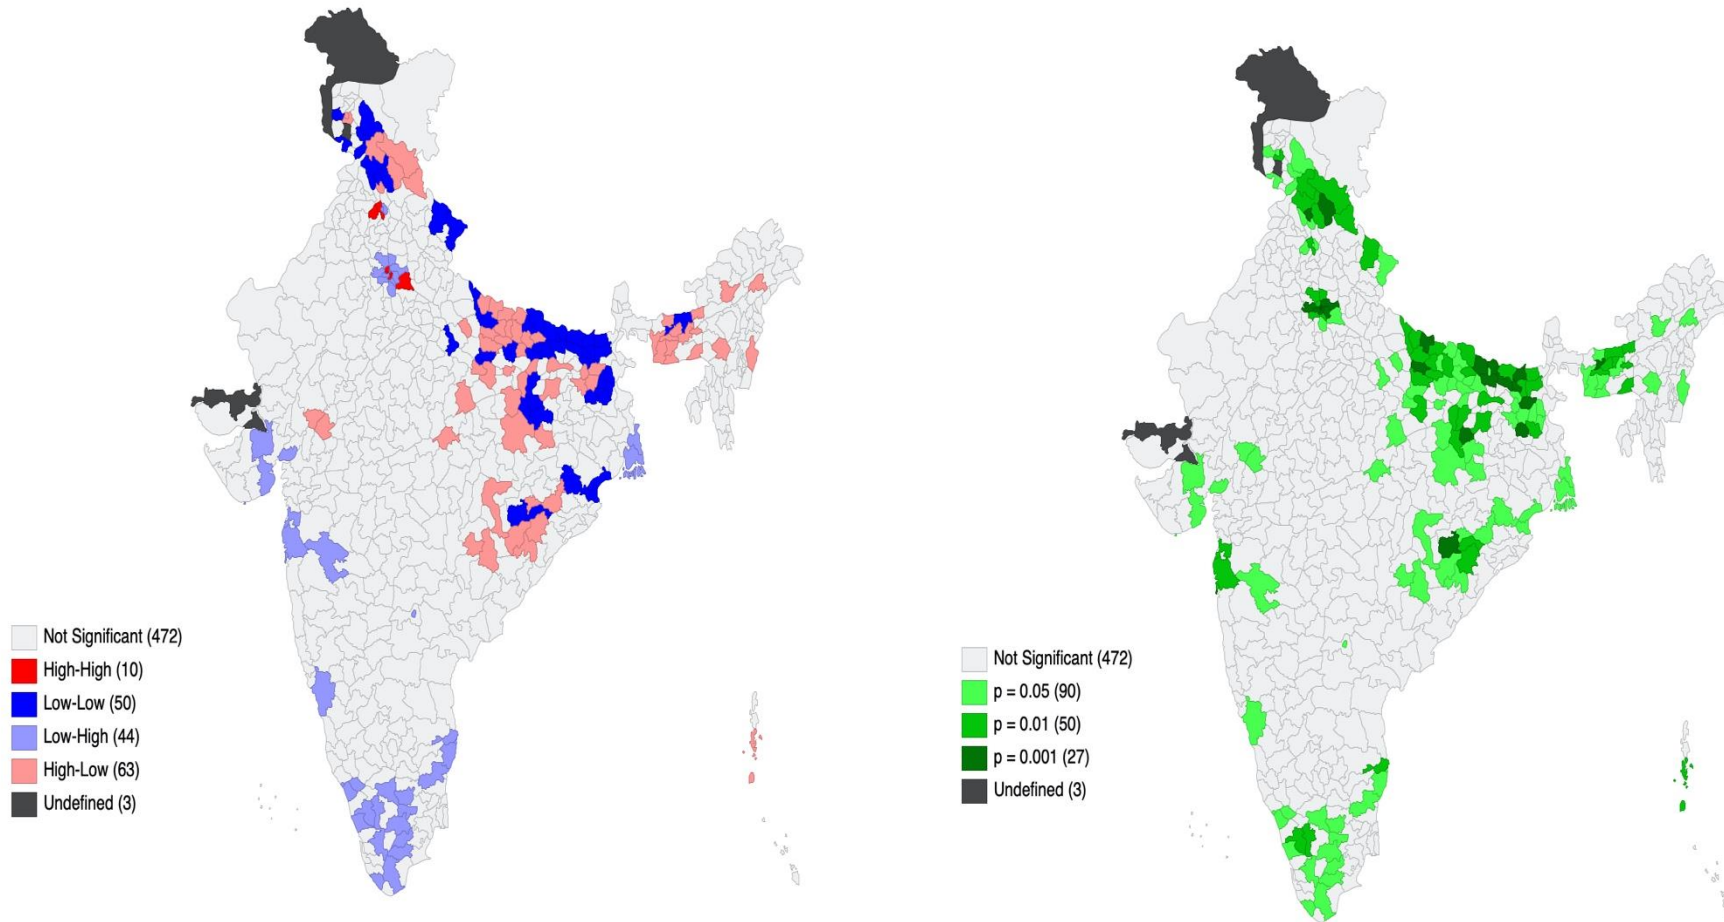

Bivariate LISA (Cluster and Significance) maps depicting spatial clustering and spatial outliers of maternal mortality ratio by percent women residing in urban areas in India (Moran's  $I=-0.152$ ,  $p$ -value=0.001)

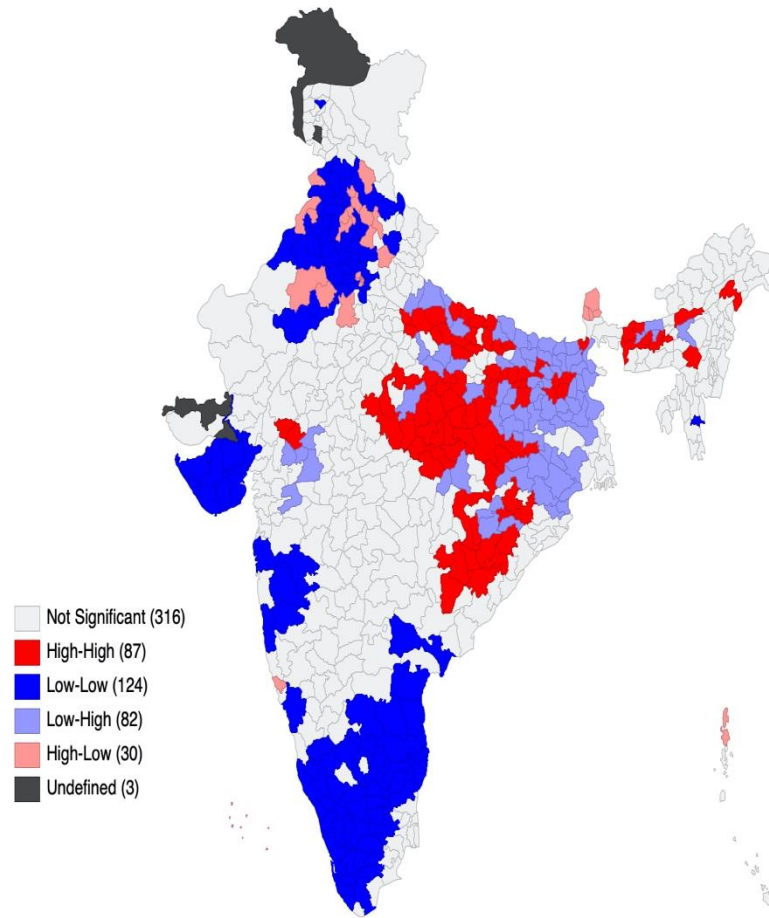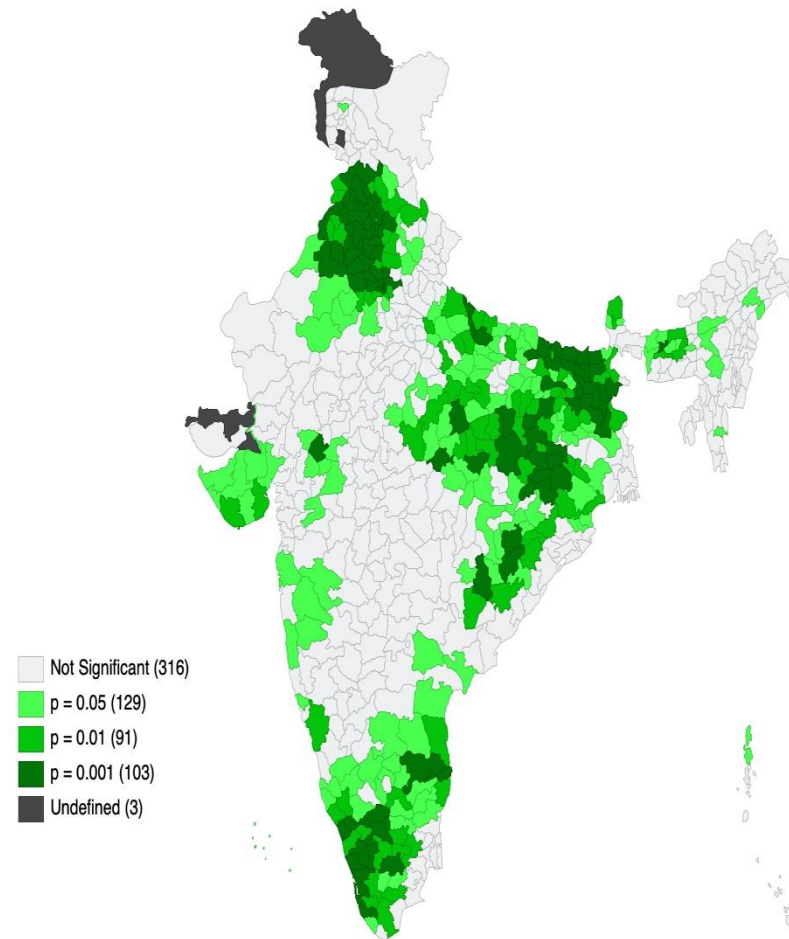

Bivariate LISA (Cluster and Significance) maps depicting spatial clustering and spatial outliers of maternal mortality ratio by percent poor in India (Moran's  $I=0.215$ ,  $p\text{-value}=0.001$ )

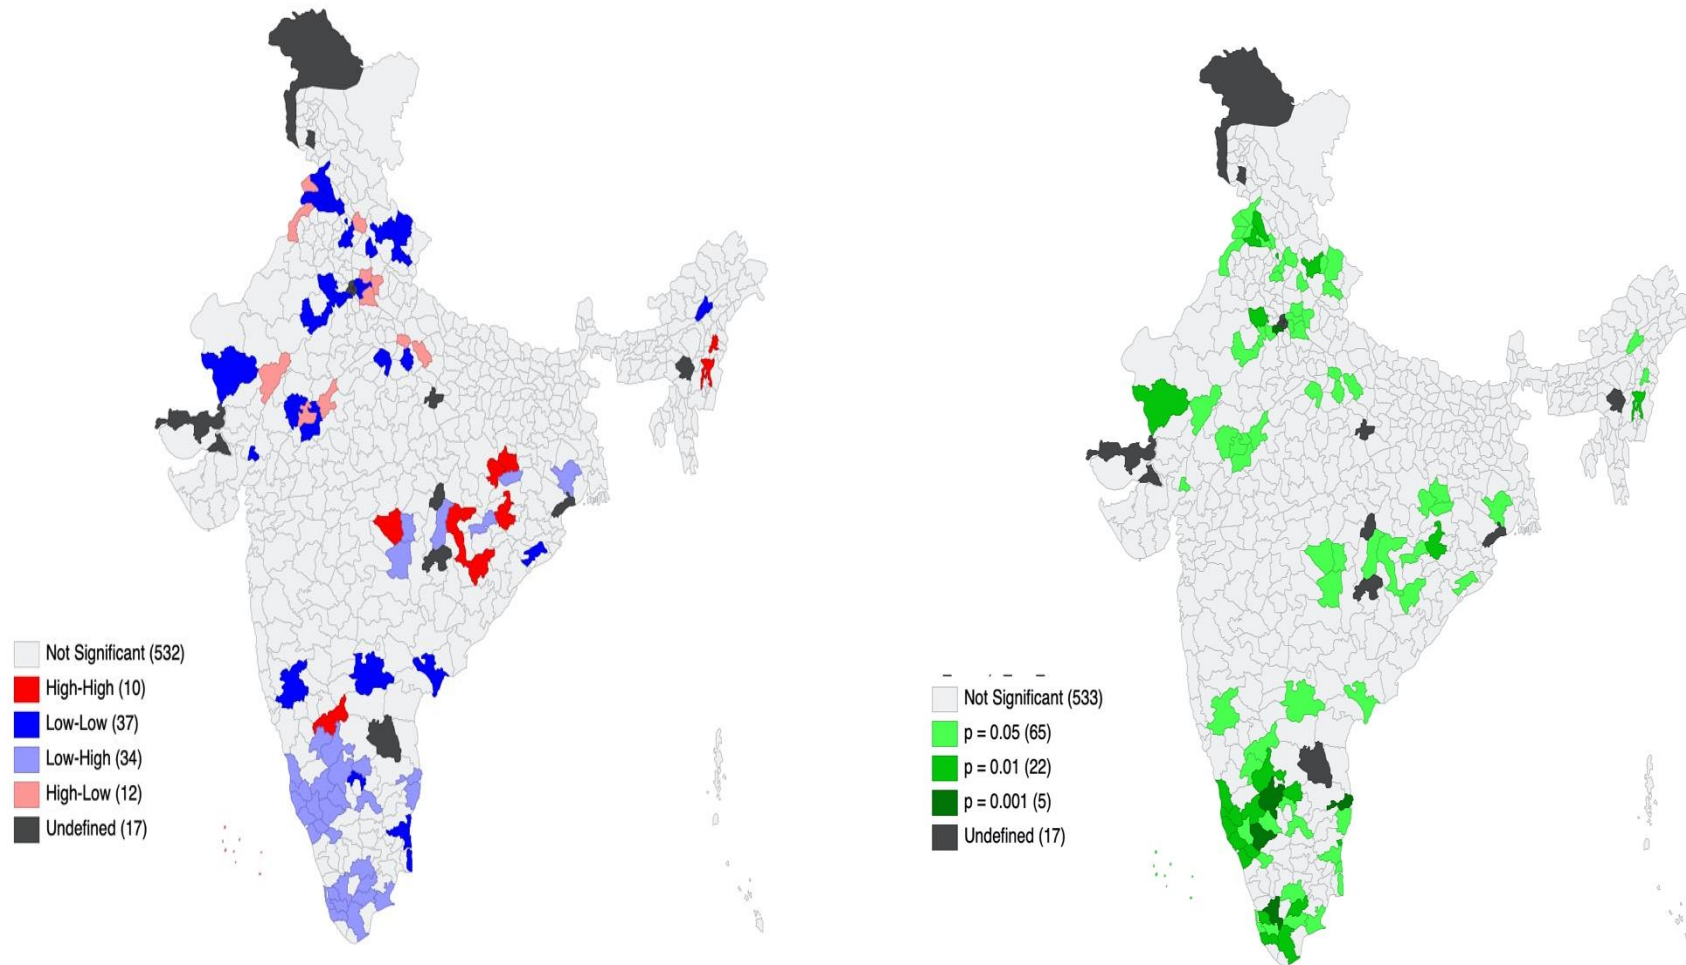

Bivariate LISA (Cluster and Significance) maps depicting spatial clustering and spatial outliers of maternal mortality ratio by sex ratio at birth in India (Moran's  $I = -0.017$ ,  $p\text{-value} = 0.189$ )

**Supplementary Table 4.** Comparison of Infant Mortality Rate, Sex Ratio at Birth and Crude Birth Rate from SRS and HMIS

| Indicator             | SRS (2018) | HMIS (2017-19) |
|-----------------------|------------|----------------|
| Infant Mortality Rate | 32         | 26.2           |
| Sex Ratio at Birth    | 111        | 108            |
| Crude Birth Rate      | 20.2       | 24             |
